# Supplementary material for: Morphological dynamics of gully systems in the sub-humid Ethiopian Highlands: The Debre Mawi watershed
Source: Copernicus journal article supplement (doi:10.5194/soil-2016-13), 2016-03-10
Supplement: Supplementary file 1 [file 13 Gully headcut retreat_DM_2013.xlsx]

## Sheet: G1
																															1.54025		2013-06-28	2013-08-05	2013-08-09	2013-08-31
			2013-06-28							2013-07-23						2013-08-05						2013-08-13						2013-08-30					2013-06-28		2013-08-05	2013-08-09	2013-08-30	2013-06-28		2013-08-05	2013-08-09	25/12/2005
		S1	S2	S3	S4	S5	S6							S1	S2	S3	S4	S5	S6	S1	S2	S3	S4	S5	S6	S1	S2	S3	S4	S5	S6		CSA1		CSA2	CSA3	CSA4	V1		V2	V3	V4		W	L	A
C2	W																									-4.1	-3	-2	2	3	3.8	C3	0	0	0	0	21.92						C1	7.9	0.4
	H																									0	-1.8	-3.7	-3.7	-1.7	0	C2	22.184	22.184	22.655	22.655	22.405				0	8.865	C2	8.5	1.6
	L																									0.4						C1	35.54	35.54	36.725	36.725	36.725	46.1792	46.1792	47.504	47.504	47.304	C3	12.5
C1	W	-4	-3	-2	2	2.9	4.2	-4	-3	-2	2	2.9	4.2	-4.3	-3	-2	2	3	4.2	-4.3	-3	-2	2	3	4.2	-4.3	-3	-2	2	3	4.2	Total	57.724	57.724	59.38	59.38	81.05	46.1792	46.1792	47.504	47.504	56.169
	H	0	-1.9	-3.72	-3.72	-1.7	0	0	-1.9	-3.72	-3.72	-1.7	0	0	-1.9	-3.72	-3.72	-1.7	0	0	-1.9	-3.72	-3.72	-1.7	0	0	-1.9	-3.67	-3.67	-1.7	0						23.326			1.3248	1.3248	9.9898
																										1.6
	L	-6	-3.5	-2.7	2.7	3.6	5.6	-6	-3.5	-2.7	2.7	3.6	5.6	-6.3	-3.5	-2.7	2.7	3.6	6.2	-6.3	-3.5	-2.7	2.7	3.6	6.2	-6.3	-3.5	-2.7	2.7	3.6	6.2					ave depth =		-3.92333
		0	-2.5	-4.4	-4.4	-2.7	0	0	-2.5	-4.4	-4.4	-2.7	0	0	-2.5	-4.4	-4.4	-2.7	0	0	-2.5	-4.4	-4.4	-2.7	0	0	-2.5	-4.4	-4.4	-2.7	0
		0						0						0						0						0
		0	0	0	0	0	0	0	0	0	0	0	0	0	0	0	0	0	0	0	0	0	0	0	0	7.38	7.5	14.8	7.7	6.46	0	0	0	0	0	21.92
		7.6	7.36	14.88	7.388	7.14	0	7.6	7.36	14.88	7.388	7.14	0	8.17	7.36	14.88	7.76	7.14	0	8.17	7.36	14.88	7.76	7.14	0	8.17	7.21	14.68	7.61	7.14	0	22.184	22.184	22.655	22.655	22.405
		15	8.65	23.76	8.55	15.12	0	15	8.65	23.76	8.55	15.12	0	15.75	8.65	23.76	8.55	16.74	0	15.75	8.65	23.76	8.55	16.74	0	15.75	8.65	23.76	8.55	16.74	0	35.54	35.54	36.725	36.725	36.725
		2013-06-28	2013-08-05	2013-08-13	2013-08-30
	W	8.2	8.5	8.5	8.5
	H	-3.72	-3.72	-3.72	-3.7
	L	1.6	1.6	1.6	2
																												2.6

## Sheet: G2
																															-70.8307		2013-06-28	2013-08-05	2013-08-09	2013-08-31
			2013-06-28							2013-07-23						2013-08-05						2013-08-13						2013-08-30					2013-06-28	2013-08-05	2013-08-09	2013-08-30	2013-06-28	2013-08-05	2013-08-09	25/12/2005
		S1	S2	S3	S4	S5	S6							S1	S2	S3	S4	S5	S6	S1	S2	S3	S4	S5	S6	S1	S2	S3	S4	S5	S6		CSA1	CSA2	CSA3	CSA4	V1	V2	V3	V4			W	L
C3	W																			-1.4	-1.2	-0.6	0.6	1.4	1.6	-1.6	-1.4	-0.6	0.6	1.5	1.7	C3	0	0	3.99	5.4275						C3	3.3	2.2
	H																			0	-0.8	-1.8	-1.7	-0.7	0	0	-0.9	-2.2	-2.2	-0.85	0	C2	4.2975	5.47	8.04	10.33			13.233	17.3333		C2	5.1	1.9
	L																			1						2.2						C1	7.72	9.276	9.2335	11.95	11.4166	14.0087	16.4098	21.166		C1	7.3
C2	W	-1.8	-1.6	-0.7	0.9	1.1	1.35	-1.8	-1.6	-0.7	0.9	1.1	1.35	-2.1	-1.8	-0.85	0.9	1.15	1.35	-2.3	-2	-0.9	1	1.5	1.75	-2.5	-2.3	-0.9	1	2.4	2.6	TOTAL	12.0175	14.746	21.2635	27.7075	11.4166	14.0087	29.6428	38.4993	42.5756
	H	0	-0.8	-1.7	-1.7	-0.9	0	0	-0.8	-1.7	-1.7	-0.9	0	0	-0.8	-2	-2	-1.2	0	0	-1.2	-2.5	-2.5	-1.2	0	0	-1.2	-2.5	-2.5	-1.4	0					15.69				27.0826	31.7492
	L																									1.9
C1	W	-2.77	-2.55	-0.8	0.9	2.9	3.2	-2.77	-2.55	-0.8	0.9	2.9	3.2	-3.17	-2.95	-1	1	3.1	3.3	-3.17	-2.95	-1	1	3.2	3.4	-3.6	-3.45	-1	1.2	3.5	3.7		ave depth =		-2.23333
	H	0	-0.7	-1.7	-1.78	-0.7	0	0	-0.7	-1.7	-1.78	-0.7	0	0	-0.6	-2	-2	-0.5	0	0	-0.6	-1.9	-1.9	-0.7	0	0	-1	-2	-2	-1.2	0
	L																									0
		0	0	0	0	0	0	0	0	0	0	0	0	0	0	0	0	0	0	1.12	1.68	2.1	1.96	1.12	0	1.44	2.54	2.64	2.79	1.445	0	0	0	3.99	5.4275
		1.44	2.16	2.72	1.06	1.215	0	1.44	2.16	2.72	1.06	1.215	0	1.68	2.92	3.5	1.22	1.62	0	2.76	3.92	4.75	2.55	2.1	0	3	4.67	4.75	4.6	3.64	0	4.2975	5.47	8.04	10.33
		1.939	3.775	2.954	4.532	2.24	0	1.939	3.775	2.954	4.532	2.24	0	1.902	5.3	4	5.7	1.65	0	1.902	5.005	3.8	5.38	2.38	0	3.6	5.9	4.4	5.56	4.44	0	7.72	9.276	9.2335	11.95
		2013-06-28	2013-07-23	2013-08-05	2013-08-13	2013-08-30
C1	W	3.15	3.15	3.45	4.05	5.1
	H	-1.7	-1.7	-2	-2.5	-2.5
	L	1.9	1.9	1.9	2.9	4.1

## Sheet: G3
																															1.54025		2013-06-28	2013-07-23	2013-08-05	2013-08-09	2013-08-31
																																	CROSS-SECTIONAL AREA (m2)					VOLUME (m3)
					2013-06-28					2013-07-23						2013-08-05						2013-08-13						2013-08-30					2013-06-28	2013-07-23	2013-08-05	2013-08-09	2013-08-30	2013-06-28	2013-07-23	2013-08-05	2013-08-09	25/12/2005
		S1	S2	S3	S4	S5	S6	S1	S2	S3	S4	S5	S6	S1	S2	S3	S4	S5	S6	S1	S2	S3	S4	S5	S6	S1	S2	S3	S4	S5	S6		CSA1	CSA2	CSA3	CSA4	CSA5	V1	V2	V3	V4	V5		W	L
C7	W
	H																															C6	0	0	0	0	0.955						C6	1.2	15
	L																															C5	0	0	0	1.26	1.62					19.3125	C5	1.8	10
C6	W																									-0.6	-0.5	-0.5	0.5	0.5	0.6	C4	0	0	1.36	2.0275	2.615				16.4375	21.175	C4	2.5	1
	H																									0	-0.5	-0.9	-0.9	-0.6	0	C3	0	1.55	3.505	5.19	12.105			2.4325	3.60875	7.36	C3	7.1	10
	L																									15						C2	1.44	1.8985	2.5101	5.0726	7.61		17.2425	30.0755	51.313	98.575	C2	5.5	8.2
C5	W																			-0.7	-0.7	-0.7	0.7	0.7	0.7	-0.9	-0.9	-0.9	0.9	0.9	0.9	C1	1.511	1.793	2.74675	6.88145	8.79	12.0991	15.1351	21.5531	49.0116	67.24	C1	6	0
	H																			0	-0.9	-0.9	-0.9	-0.9	0	0	-0.9	-0.9	-0.9	-0.9	0
	L																			10						10
C4	W													-0.8	-0.8	-0.8	0.9	0.9	0.9	-1	-0.8	-0.65	0.8	0.9	1.1	-1.2	-1.1	-1	1	1.2	1.3	TOTAL	2.951	5.2415	10.1219	20.4316	33.695	12.0991	32.3776	54.0611	120.371	213.663
	H													0	-0.8	-0.8	-0.8	-0.8	0	0	-1	-1.1	-1.1	-0.8	0	0	-1	-1.1	-1.1	-1	0						30.744	0	20.2785	41.962	108.272	201.563
	L													1						1						1
C3	W							-0.7	-0.7	-0.7	0.85	0.85	0.85	-1.6	-1.5	-0.9	1	1.4	1.7	-2.4	-2.2	-1.7	1.7	2.3	2.5	-3.5	-3.3	-2.5	2.5	3.4	3.6
	H							0	-1	-1	-1	-1	0	0	-0.5	-1.3	-1.3	-0.6	0	0	-0.6	-1.2	-1.2	-0.6	0	0	-1.5	-1.8	-1.8	-1.5	0		channal change = C3+C4+C5+C6				36
	L	8						10						10						10						10							ave depth =				-1.38333
C2	W	-0.16	-0.16	-0.16	0.86	2.15	2.45	-0.32	-0.32	-0.32	1.2	2.25	2.45	-0.66	-0.6	-0.6	1.2	2.23	2.47	-1.53	-1	-0.85	1	2.35	2.5	-2.8	-2.6	-1	1	2.5	2.7
	H	0	-0.45	-0.65	-0.65	-0.45	0	0	-0.5	-0.8	-0.8	-0.42	0	0	-0.55	-0.94	-0.94	-0.5	0	0	-1.14	-1.6	-1.6	-0.7	0	0	-0.6	-1.8	-1.8	-0.8	0
	L	8.2						8.2						8.2						8.2						8.2																Headcut depth
C1	W	-0.78	-0.65	-0.4	0.9	1.23	1.5	-0.87	-0.72	-0.4	0.9	1.53	1.75	-0.97	-0.72	-0.54	1.1	1.7	1.87	-1.76	-1.45	-1	1.1	2	2.25	-3	-2.8	-1.5	1.5	2.8	3									2013-06-28	C2	-0.65
	H	0	-0.65	-0.75	-0.75	-0.65	0	0	-0.45	-0.85	-0.85	-0.42	0	0	-0.55	-1.2	-1.2	-0.5	0	0	-1.74	-1.91	-1.91	-1.6	0	0	-0.6	-1.8	-1.8	-0.8	0									2013-07-23	C3	-1
	L																									0														2013-08-05	C4	-0.8
		0	0	0	0	0	0	0	0	0	0	0	0	0	0	0	0	0	0	0	0	0	0	0	0	0.3	0.2	0.9	0.15	0.36	0	0	0	0	0	0.955				2013-08-09	C5	-0.9
		0	0	0	0	0	0	0	0	0	0	0	0	0	0	0	0	0	0	0.63	0	1.26	0	0.63	0	0.81	0	1.62	0	0.81	0	0	0	0	1.26	1.62				2013-08-30	C6	-0.9
		0	0	0	0	0	0	0	0	0	0	0	0	0.64	0	1.36	0	0.72	0	1	0.23	1.595	0.35	0.88	0	1.2	0.21	2.2	0.32	1.3	0	0	0	1.36	2.0275	2.615					AVE	-0.85
		0	0	0	0	0	0	0.7	0	1.55	0	0.85	0	0.8	1.5	2.47	1.22	1.02	0	1.44	1.62	4.08	1.74	1.5	0	5.25	2.19	9	2.37	5.4	0	0	1.55	3.505	5.19	12.105
		0.072	0.032	0.663	1.0105	1.1025	0	0.16	0.096	1.216	1.296	1.029	0	0.363	0.234	1.692	1.4962	1.235	0	1.7442	0.631	2.96	3.06	1.75	0	1.68	4.08	3.6	3.7	2.16	0	1.44	1.8985	2.5101	5.0726	7.61
		0.507	0.2275	0.975	0.3375	0.975	0	0.3915	0.432	1.105	0.9225	0.735	0	0.5335	0.567	1.968	1.49	0.935	0	3.0624	1.0295	4.011	2.06	3.6	0	1.8	4.14	5.4	3.84	2.4	0	1.511	1.793	2.74675	6.88145	8.79
		2013-06-28	2013-07-23	2013-08-05	2013-08-13	2013-08-30
C1	W	2.61	2.77	3.13	4.9	7.1
	H	-0.65	-1	-1.3	-1.2	-1.8
	L	8.2	18.2	19.2	29.2	44.2
[truncated: 6 more columns]

## Sheet: G4
																															1.54025		2013-06-28	2013-07-23	2013-08-05	2013-08-09	2013-08-31
																																	CROSS-SECTIONAL AREA (m2)					VOLUME (m3)
					2013-06-28					2013-07-23						2013-08-05						2013-08-13						2013-08-30					2013-06-28	2013-07-23	2013-08-05	2013-08-09	2013-08-30	2013-06-28	2013-07-23	2013-08-05	2013-08-09	25/12/2005							CHANNAL LENGTH (m)
		S1	S2	S3	S4	S5	S6	S1	S2	S3	S4	S5	S6	S1	S2	S3	S4	S5	S6	S1	S2	S3	S4	S5	S6	S1	S2	S3	S4	S5	S6		CSA1	CSA2	CSA3	CSA4	CSA5	V1	V2	V3	V4	V5			W	L			0
c4	W																									-0.75	-0.75	-0.75	0.75	0.75	0.75	C4	0	0	0	0	2.25					11.999		C4	1.5	2.6			2.4
	H																									0	-1.5	-1.5	-1.5	-1.5	0	C3	0	0	0	4.615	6.98				23.056	40.271		C3	4.8	4.4			4.9
	L																									2.6						C2	3.65	5.1793	5.073	5.865	11.325	4.5579	6.21123	8.5713	9.33	14.697		C2	6.2	1.2			7.4
c3	W																			-1.75	-1.75	-1.75	1.8	1.8	1.8	-2.4	-2.2	-0.8	0.8	2.2	2.4	C1	3.9465	5.17275	9.2125	9.685	13.17							C1	6.7
	H																			0	-1.3	-1.3	-1.3	-1.3	0	0	-0.8	-1.9	-1.9	-0.8	0	TOTAL	7.5965	10.352	14.2855	20.165	33.725	4.5579	6.21123	8.5713	32.386	54.968	52.8077
	L																			4.4						4.4											26.1285		1.65333	4.0134	27.8281	50.4101	50.0987
c2	W	-2.45	-2.3	-0.45	0.5	1.5	1.7	-2.5	-2.3	-0.5	0.54	1.55	1.76	-2.5	-2.3	-0.5	0.6	1.55	1.78	-2.5	-2.3	-0.6	0.8	2.2	2.4	-3.1	-2.9	-0.8	0.9	2.9	3.1
	H	0	-0.5	-1.2	-1.2	-0.5	0	0	-0.6	-1.74	-1.7	-0.6	0	0	-0.7	-1.6	-1.6	-0.7	0	0	-0.7	-1.6	-1.6	-0.6	0	0	-1.2	-2.3	-2.3	-1.2	0					Channal length = c3 + c4			7
	L													1.2						1.2						1.2										ave depth =			-2.025
c1	W	-2.3	-2.1	-0.6	0.8	1.6	1.8	-2.3	-2.1	-0.8	1.1	1.9	2.11	-2.3	-2.1	-0.8	1.1	2.3	2.47	-2.3	-2.1	-1	1.2	2.34	2.53	-3.2	-3	-1.4	1.4	3.3	3.5
	H	0	-0.6	-1.23	-1.23	-0.6	0	0	-0.8	-1.4	-1.41	-0.85	0	0	-1.5	-2.35	-2.35	-1	0	0	-1.9	-2.35	-2.3	-1.1	0	0	-1.1	-2.4	-2.4	-1.2	0												Headcut depth
	L																									0															2013-08-05	C2	-1.6
																																									2013-08-09	C3	-1.3
		0	0	0	0	0	0	0	0	0	0	0	0	0	0	0	0	0	0	0	0	0	0	0	0	1.125	0	2.25	0	1.125	0	0	0	0	0	2.25					2013-08-30	C4	-1.5
		0	0	0	0	0	0	0	0	0	0	0	0	0	0	0	0	0	0	2.275	0	4.615	0	2.34	0	1.92	3.54	3.04	3.54	1.92	0	0	0	0	4.615	6.98						AVE	-1.46667
		1.225	2.535	1.14	1.55	0.85	0	1.5	3.702	1.7896	2.311	1.056	0	1.75	3.33	1.76	2.06	1.246	0	1.75	3.26	2.24	3.04	1.44	0	3.72	5.71	3.91	5.59	3.72	0	3.65	5.1793	5.073	5.865	11.325
		1.38	2.223	1.722	1.488	1.08	0	1.84	2.3	2.668	1.744	1.7935	0	3.45	3.735	4.465	4.305	2.47	0	4.37	3.035	5.12	4.062	2.783	0	3.52	5.66	6.72	6.24	4.2	0	3.9465	5.17275	9.2125	9.685	13.17
		2013-06-28	2013-07-23	2013-08-05	2013-08-13	2013-08-30			2014-10-18
	W	4.15	4.26	4.28	4.9	6.2			0					3.3
	H	-1.2	-1.74	-1.6	-1.6	-1.9			2.15					2.15
	L	1.2	1.2	1.2	5.6	8.2			2
	W								0					4.2
	H								1.9					1.9
	L								3
	W								0					5.4
	H								2.4					2.4
	L								0
[truncated: 4 more columns]

## Sheet: G5
																															1.54025		2013-06-28	2013-07-23	2013-08-05	2013-08-09	2013-08-31
																																	CROSS-SECTIONAL AREA (m2)					VOLUME (m3)
					2013-06-28					2013-07-23						2013-08-05						2013-08-13						2013-08-30					2013-06-28	2013-07-23	2013-08-05	2013-08-09	2013-08-30	2013-06-28	2013-07-23	2013-08-05	2013-08-09	25/12/2005						CHANNAL LENGTH (m)	VOLUME (m3)
		S1	S2	S3	S4	S5	S6	S1	S2	S3	S4	S5	S6	S1	S2	S3	S4	S5	S6	S1	S2	S3	S4	S5	S6	S1	S2	S3	S4	S5	S6		CSA1	CSA2	CSA3	CSA4	CSA5	V1	V2	V3	V4	V5					C1	0
C1	W																									-9.3	-8.7	-4	5	9	9.2	C4	0	0	0	0	43.64						C4	18.5	2.5		C2	2.4	99.3976
	H																									0	-0.8	-3	-3	-0.7	0	C3	0	0	0	68.98	96.05					174.613	C3	25	7.5		C3	4.9	97.6392
	L																									2.5						C2	53.315	61.6565	69.4485	87.5542	112.22				587.003	781.012	C2	32	5.2		C4	7.4	100.227
C2	W																			-11.3	-11	-2.7	2.6	10.9	11.2	-12.2	-11.7	-2.9	3	12	12.8	C1	40.8025	55.215	66.8577	91.297	98.64	244.706	303.866	354.396	465.013	548.236	C1	30.5			C5	15.4	366.798
	H																			0	-1.1	-4.3	-4.2	-1.5	0	0	-2	-5.1	-5.1	-2.3	0	TOTAL	94.1175	116.871	136.306	247.831	350.55	244.706	303.866	354.396	1052.02	1503.86					1967.63	20.8	142.832
	L																			7.5						7.5											256.433					1259.16					1575.07	30.8	70.8019
C3	W	-9	-8.7	-1.1	1.1	11.5	11.7	-9.02	-8.8	-1.4	1.3	13.45	13.76	-11.9	-11.65	-1.6	1.6	15.35	15.57	-12	-11.7	-1.7	1.8	16.74	16.95	-15	-14.5	-1.8	1.8	15.7	17																	36.8	28.9043
	H	0	-0.5	-4.3	-4.3	-0.6	0	0	-0.6	-4.4	-4.5	-0.6	0	0	-0.65	-4.1	-4.1	-0.6	0	0	-0.85	-4.9	-4.9	-0.65	0	0	-1	-5.8	-5.8	-1	0																	39.8	9.36188
	L													5.2						5.2						5.2																						158.3
C4	W	-8	-7.8	-1.4	1.5	10.45	10.75	-9.5	-9.3	-1.45	1.5	10.8	11.05	-12	-11.73	-1.55	1.65	10.8	11.05	-12.63	-12.42	-1.8	1.7	15.2	15.41	-15	-14.7	-1.8	1.8	14.7	15.5				channal change = c3+c4			10
	H	0	-0.6	-3.4	-3.4	-0.62	0	0	-0.65	-4.2	-4.3	-0.75	0	0	-0.75	-4.6	-4.6	-0.8	0	0	-1.1	-5	-5	-1.1	0	0	-1	-5.08	-5.08	-1.2	0				ave depth =			-4.745
	L																									0
																																										Headcut depth
		0	0	0	0	0	0	0	0	0	0	0	0	0	0	0	0	0	0	0	0	0	0	0	0	7.44	22.9	27	23.5	6.44	0	0	0	0	0	43.64				2013-08-05	C3	-4.1
		0	0	0	0	0	0	0	0	0	0	0	0	0	0	0	0	0	0	12.43	44.33	22.52	41.88	16.8	0	24.4	53.87	30.09	54.3	29.44	0	0	0	0	68.98	96.05				2013-08-13	C2	-4.3
		4.5	36.86	9.46	48.79	7.02	0	5.412	37.88	12.02	59.745	8.256	0	7.735	46.725	13.12	61.975	9.342	0	10.2	55.885	17.15	80.856	11.0175	0	15	82.3	20.88	89.26	17	0	53.315	61.6565	69.4485	87.5542	112.22				2013-08-30	C1	-3
		4.8	25.68	9.86	34.6	6.665	0	6.175	38.1175	12.535	45.315	8.2875	0	9	52.7955	14.72	48.36	8.84	0	13.893	60.12	17.5	74.13	16.951	0	15	72.876	18.288	72.516	18.6	0	40.8025	55.215	66.8577	91.297	98.64					AVE	-3.8
		2013-06-28	2013-07-23	2013-08-05	2013-08-13	2013-08-30				2014-10-18
C1	W	20.7	22.78	27.47	28.95	32			0					5.6
	H	-4.3	-4.5	-4.1	-4.3	-5.1			4					4
	L	5.2	5.2	5.2	12.7	15.2			4.6
C2	W								0					10.2
	H								4.3					4.3
	L								3
C3	W								0					14.3
	H								5					5
	L								0
[truncated: 3 more columns]

## Sheet: G6
					2013-06-28											2013-07-23						2013-08-05						2013-08-13						2013-08-31														11.0476
		21/10/2005							2013-07-21					2013-07-23						2013-08-05						2013-08-13						2013-08-31								2013-09-06						2013-09-18
		S1	S2	S3	S4	S5	S6	S1	S2	S3	S4	S5	S6	S1	S2	S3	S4	S5	S6	S1	S2	S3	S4	S5	S6	S1	S2	S3	S4	S5	S6	S1	S2	S3	S4	S5	S6	S1	S2	S3	S4	S5	S6	S1	S2	S3	S4	S5	S6
C20	W																																					0	0.1	1.5	2.4	2.9	3	0	0.1	1.5	2.4	2.9	3
	H				2013-06-28	2013-07-21	2013-07-23	2013-08-05	2013-08-13	2013-08-31	2013-09-18																											2.8	0.1	0	0	0.1	2.8	2.8	0.1	0	0	0.1	2.8
	L			W	2.2	3.4	5.9	6.8	10.7	11.9	13																											0						0
C19	W			H	3	3	4.2	4.4	4.6	3	4.3																											0	0.2	4.7	5.5	7.7	8	0	0.2	4.7	5.5	7.7	8
	H			L	4.1	4.1	4.1	4.1	10	13.4	16.2																											3.9	1.2	0	0	1.9	3.9	3.9	1.2	0	0	1.9	3.9
	L																																					2.6						2.6
C18	W																															0	0.1	3	3.6	6.3	6.4	0	0.2	4.5	5.5	9	9.3	0	0.2	4.5	5.5	9	9.3
	H																															3.6	1	0	0	1.4	3.6	4.3	2.2	0	0	3.1	4.3	4.3	2.2	0	0	3.1	4.3
	L																															3.4						3.4						3.4
C17	W																									0	0.2	4	4.8	7.9	8	0	0.2	4.5	5.5	9.9	10	0	0.2	4.3	5.9	9.7	10	0	0.2	4.3	5.9	9.7	10
	H																									3	0.3	0	0	0.2	3	3	1.3	0	0	0.9	3	3.1	1.1	0	0	1.5	3.1	3.1	1.1	0	0	1.5	3.1
	L																									5.9						5.9						5.9						5.9
C16	W	0	0.8	1	1.5	2	2.2	0	0.8	1.5	2	2.6	3.4	0	1.1	2.6	3.9	4.8	5.9	0	1.3	3	4.4	5.6	6.8	0	2	4.8	6.4	8	10.7	0	2	5.1	6.7	8	11.9	0	2	6	7.6	11.5	13	0	2	6	7.6	11.5	13
	H	3	2.1	0	0	1.8	3	3	2.1	0	0	1.8	3	4.2	1.2	0	0	1.2	4.2	4.4	1.2	0	0	1	4.4	4.6	1.4	0	0	1	4.6	4.4	1.2	0	0	0.98	4.4	4.4	2.3	0	0	2.6	4.4	4.4	2.3	0	0	2.6	4.4
	L	4.1						4.1						4.1						4.1						4.1						4.1						4.1						4.1
C15	W	0	0.8	1.8	2.8	4.3	4.9	0	0.8	1.8	2.8	4.3	4.9	0	1.5	3	4.1	4.8	6.5	0	1.3	3	4.1	5.6	7.2	0	1.9	5	6.4	7.8	12.2	0	2	6.4	7.6	8.3	13.1	0	2	6.5	7.7	11	13.4	0	2	6.5	7.7	11	13.4
	H	4.5	2	0	0	3	4.5	4.5	2	0	0	3	4.5	4.8	2	0	0	2.8	4.8	4.8	2.4	0	0	3	4.8	5	2.4	0	0	2.6	5	5	2.2	0	0	2.6	5	4.9	2.3	0	0	2.3	4.9	4.9	2.3	0	0	2.3	4.9
	L	2.3						2.3						2.3						2.3						2.3						2.3						2.3						2.3
C14	W	0	0.8	1.6	2.4	4.3	4.7	0	0.8	1.6	2.4	4.3	4.7	0	2	3	4.2	5.1	6.35	0	2	3.6	4.8	6.2	7.4	0	2	5.4	6.6	7.5	11.75	0	2.3	5.6	6.8	8	12.35	0	1.8	6	7.2	10.5	13.4	0	1.8	6	7.2	10.5	13.4
	H	5	2.4	0	0	3	5	5	2.4	0	0	3	5	5	2.4	0	0	2.8	5	6	2.2	0	0	2.4	6	6	2.2	0	0	2.4	6	6	2.4	0	0	2.8	6	5.9	3	0	0	3.3	5.9	5.9	3	0	0	3.3	5.9
	L	1.2						1.2						1.2						1.2						1.2						1.2						1.2						1.2
C13	W	0	3	3.8	4.8	5.6	8.1	0	3	3.8	4.8	5.6	8.1	0	3.2	4.3	5.8	7.5	10.05	0	3.2	4.3	5.8	8	11	0	4	6.2	8.2	9.7	14.49	0	3	6.3	8.3	11	15.35	0	2.3	6.7	8.7	12.8	16.6	0	2.3	6.7	8.7	12.8	16.6
	H	5	2.1	0	0	3.2	5	5	2.1	0	0	3.2	5	4.8	2.2	0	0	3	4.8	5.1	2	0	0	3	5.1	5.8	2	0	0	3.2	5.8	5.7	1.5	0	0	2.7	5.7	5.8	1.3	0	0	1.8	5.8	5.8	1.3	0	0	1.8	5.8
	L	4.3						4.3						4.3						4.3						4.3						4.3						4.3						4.3
C12	W	0	3	4.3	5.6	6.7	9.5	0	3	4.3	5.6	6.7	9.5	0	3	4.3	5.8	7.5	10	0	2.8	4.6	6.1	8.2	10.3	0	3	6.2	7.3	11.15	14.11	0	3.6	8.3	9.6	13.6	16	0	2.8	8	9.3	15.6	17.1	0	2.8	8	9.3	15.6	17.1
	H	6	4.6	0	0	3.5	6	6	4.6	0	0	3.5	6	6	3	0	0	4	6	6	2.6	0	0	3.7	6	6	2.6	0	0	4.1	6	6	1.5	0	0	2.3	6	6	1.5	0	0	2	6	6	1.5	0	0	2	6
	L	12.7						12.7						12.7						12.7						12.7						12.7						12.7						12.7
C11	W	0	7.2	12.3	13.5	20	26.2	0	7.2	12.3	13.5	20	26.2	0	7.2	12.3	13.5	20	25.8	0	7.8	14	15	20	27.3	0	8	14.5	15.6	29	31.29	0	6	15.6	17.6	32	32.85	0	3	15.6	17.6	29.4	33.8	0	3	15.6	17.6	29.4	33.8
	H	6.6	4.2	0	0	3.8	6.6	6.6	4.2	0	0	3.8	6.6	6.6	3.75	0	0	4.13	6.6	6.2	3.7	0	0	3.8	6.2	6.6	3.5	0	0	3.4	6.6	6.6	4.6	0	0	5.4	6.6	6.6	3.2	0	0	4.7	6.6	6.6	3.2	0	0	4.7	6.6
	L	17.8						17.8						17.8						17.8						17.8						17.8						17.8						17.8
C10																																												0	10	15.6	18.6	24	35
																																												4.2	1.3	0	0	1.9	4.2
																																												27
C9																																												0	8	14.9	17.5	25	33.2
																																												5.5	2	0	0	2.7	5.5
																																												35
C8																																												0	0.4	20	28.7	37.6	38.5
																																												4.6	4	0	0	3.9	4.6
																																												20
C7																																												0	1.6	9.8	12.6	22.7	23
																																												5.1	3	0	0	4.3	5.1
																																												56
C6																																												0	11	15.3	17.6	21	31.4
																																												6.6	1.6	0	0	2.1	6.6
																																												17.3
C5																																												0	1	4.2	6.3	8.1	9
																																												3	0.7	0	0	0.4	3
																																												13.2
C4																																												0	2	3.4	5.7	7	8.6
																																												2.3	0.5	0	0	0.6	2.3
																																												5.8
C3																																												0	5	6.5	8.5	10	14
																																												2.4	0.4	0	0	0.3	2.4
																																												16.6
C20																																												0	2.9	3.5	6	7.2	9
																																												2.9	0.4	0	0	0.5	2.9
																																												34.2
C1																																												0	5	5.8	7.5	8.2	12.4
																																												1.4	0.2	0	0	0.3	1.4
																																												22.6
																																						-0.28	-0.15	0	0.24	7.82	8.4	-0.28	-0.15	0	0.24	7.82	8.4
																																						-0.78	-5.64	0	10.45	14.83	31.2	-0.78	-5.64	0	10.45	14.83	31.2
																																-0.36	-3	0	5.04	13.72	23.04	-0.86	-9.9	0	17.05	9.87	39.99	-0.86	-9.9	0	17.05	9.87	39.99
																										-0.6	-1.2	0	0.96	22.1	24	-0.6	-5.85	0	4.95	20.7	30	-0.62	-4.73	0	8.85	15.07	31	-0.62	-4.73	0	8.85	15.07	31
		-2.4	-2.1	0	2.7	2.04	6.6	-2.4	-3.15	0	3.6	1.68	10.2	-4.62	-3.12	0	4.68	13.08	24.78	-5.72	-3.6	0	4.4	17.84	29.92	-9.2	-6.72	0	6.4	26.1	49.22	-8.8	-6.12	0	6.566	23.538	52.36	-8.8	-13.8	0	19.76	16.8	57.2	-8.8	-13.8	0	19.76	16.8	57.2
		-3.6	-3.6	0	8.4	4.65	22.05	-3.6	-3.6	0	8.4	4.65	22.05	-7.2	-6	0	11.48	4.84	31.2	-6.24	-7.2	0	12.3	5.28	34.56	-9.5	-12	0	16.64	7.28	61	-10	-14.08	0	19.76	7.44	65.5	-9.8	-14.95	0	17.71	23.08	65.66	-9.8	-14.95	0	17.71	23.08	65.66
		-4	-3.84	0	7.2	7.4	23.5	-4	-3.84	0	7.2	7.4	23.5	-10	-7.2	0	11.76	7.72	31.75	-12	-7.92	0	11.52	19.44	44.4	-12	-11.88	0	15.84	16.8	70.5	-13.8	-13.44	0	19.04	13.42	74.1	-10.62	-18	0	23.76	17.73	79.06	-10.62	-18	0	23.76	17.73	79.06
		-15	-7.98	0	15.36	2.08	40.5	-15	-7.98	0	15.36	2.08	40.5	-15.36	-9.46	0	17.4	5.85	48.24	-16.32	-8.6	0	17.4	7.8	56.1	-23.2	-12.4	0	26.24	9.892	84.042	-17.1	-9.45	0	22.41	21.255	87.495	-13.34	-8.71	0	15.66	44.36	96.28	-13.34	-8.71	0	15.66	44.36	96.28
		-18	-19.78	0	19.6	6.95	57	-18	-19.78	0	19.6	6.95	57	-18	-12.9	0	23.2	5	60	-16.8	-11.96	0	22.57	11.09	61.8	-18	-16.12	0	29.93	9.049	84.66	-21.6	-12.45	0	22.08	44.8	96	-16.8	-12	0	18.6	59.4	102.6	-16.8	-12	0	18.6	59.4	102.6
		-47.52	-51.66	0	51.3	32.44	172.92	-47.52	-51.66	0	51.3	32.44	172.92	-47.52	-46.125	0	55.755	25.446	170.28	-48.36	-51.8	0	57	20.26	169.26	-52.8	-50.75	0	53.04	85.014	206.514	-39.6	-71.76	0	95.04	33.81	216.81	-19.8	-49.92	0	82.72	35.18	223.08	-19.8	-49.92	0	82.72	35.18	223.08
				ave W	9.26667																																							-42	-20.28	0	35.34	34.3	147
	2014-10-18			Ave D	5.01667																																							-44	-29.8	0	47.25	47.86	182.6
C1	W	0					13																																					-1.84	-80	0	111.93	22.81	177.1
	H	4.6					4.6																																					-8.16	-29.4	0	54.18	16.87	117.3
	L	2.1																																										-72.6	-24.48	0	36.96	72.66	207.24
C2	W	0					16																																					-3	-2.94	0	2.52	20.7	27
	H	5.3					5.3																																					-4.6	-1.7	0	3.42	10.94	19.78
C3	L	0																																										-12	-2.6	0	2.55	19.8	33.6
	Narrow gully above the gully head
		W	0.4
		H	1.2
		L	20.5
[truncated: 21 more columns]

## Sheet: G7
																															1.54025		2013-06-28	2013-08-05	2013-08-09	2013-08-31
				2013-06-28						2013-07-23						2013-08-05						2013-08-13						2013-08-30					2013-06-28	2013-08-05	2013-08-09	2013-08-30	2013-06-28	2013-08-05	2013-08-09	25/12/2005						CHANNAL LENGTH (m)	VOLUME (m3)	DEPTH (m)	WIDTH (m)
		S1	S2	S3	S4	S5	S6							S1	S2	S3	S4	S5	S6	S1	S2	S3	S4	S5	S6	S1	S2	S3	S4	S5	S6		CSA1	CSA2	CSA3	CSA4	V1	V2	V3	V4		W	L		C1	0		-5.1	11.5
C3	W																									-0.8	-0.8	-0.8	0.8	0.8	0.8	C3	0	0	0	1.92					C3	1.6	0.2		C2	2.4	99.3976	-5.1	11.6
	H																									0	-1.2	-1.2	-1.2	-1.2	0	C2	5.66	5.66	5.91	6.18				0.81	C2	5	1.6		C3	4.9	97.6392	-4.7	9
	L																									0.2						C1	10.234	10.56	10.035	11.095	12.7152	12.976	12.756	13.82	C1	7.3	0		C4	7.4	100.227	-4.7	12
C2	W	-2.2	-1.9	-0.9	1	2.3	2.48	-2.2	-1.9	-0.9	1	2.3	2.48	-2.2	-1.9	-0.9	1	2.3	2.48	-2.5	-2	-1	1	2.3	2.5	-2.5	-2.3	-1.1	1.2	2.3	2.5		15.894	16.22	15.945	19.195	12.7152	12.976	12.756	14.63					26.5582
	H	0	-1	-1.4	-1.4	-1	0	0	-1	-1.4	-1.4	-1	0	0	-1	-1.4	-1.4	-1	0	0	-1	-1.4	-1.4	-1	0	0	-1	-1.4	-1.4	-1	0					3.301				1.9148					12.2997
	L																									1.6
C1	W	-3.5	-3.3	-1.6	1.6	3.14	3.56	-3.5	-3.3	-1.6	1.6	3.14	3.56	-3.5	-3.3	-1.6	1.6	3.4	3.7	-3.5	-3.3	-1.6	1.6	3.4	3.7	-3.6	-3.4	-2.1	2.2	3.5	3.7
	H	0	-0.6	-1.7	-1.7	-1.5	0	0	-0.6	-1.7	-1.7	-1.5	0	0	-0.6	-1.7	-1.7	-1.5	0	0	-0.6	-1.7	-1.7	-1	0	0	-0.6	-1.7	-1.7	-1.5	0
	L																									0
																																					ave depth =		-1.43333
		0	0	0	0	0	0	0	0	0	0	0	0	0	0	0	0	0	0	0	0	0	0	0	0	0.96	0	1.92	0	0.96	0	0	0	0	1.92
		2.2	1.76	2.66	2.22	2.48	0	2.2	1.76	2.66	2.22	2.48	0	2.2	1.76	2.66	2.22	2.48	0	2.5	1.8	2.8	2.22	2.5	0	2.5	2.12	3.22	2.02	2.5	0	5.66	5.66	5.91	6.18
		2.1	4.65	5.44	2.938	5.34	0	2.1	4.65	5.44	2.938	5.34	0	2.1	4.65	5.44	3.38	5.55	0	2.1	4.65	5.44	4.18	3.7	0	2.16	4.52	7.31	2.65	5.55	0	10.234	10.56	10.035	11.095
		2013-06-28	2013-07-23	2013-08-05	2013-08-13	2013-08-30
C1	W	4.68	4.68	4.68	5	5
	H	-1.4	-1.4	-1.4	-1.4	-1.4
	L	1.6	1.6	1.6	1.6	1.8
[truncated: 1 more columns]

## Sheet: G8
																																																	1.54025
					2013-06-28				2013-07-21							2013-07-23						2013-08-05						2013-08-13						2013-08-30						2013-09-06						2013-09-18
		S1	S2	S3	S4	S5	S6	S1	S2	S3	S4	S5	S6	S1	S2	S3	S4	S5	S6	S1	S2	S3	S4	S5	S6	S1	S2	S3	S4	S5	S6	S1	S2	S3	S4	S5	S6	S1	S2	S3	S4	S5	S6	S1	S2	S3	S4	S5	S6
C1	W	0	0.4	3	4.3	6.8	6.9	0	0.4	3.6	4.3	7	7.2	0	0.6	4.2	5.3	8.6	8.8	0	0.5	4.8	5.5	9.8	9.9	0	0.35	4.8	5.6	10	10.4	0	0.35	4.8	5.6	10	10.4	0	0.4	4.7	6	11	11.5	0	0.4	4.7	6	11	11.5
	H	4	3	0	0	2.7	4	4	3	0	0	2.7	4	4.8	3.4	0	0	3.7	4.8	5	4.6	0	0	4.4	5	4.9	4	0	0	3.75	4.9	4.9	4	0	0	3.75	4.9	5.1	4.7	0	0	4.7	5.1	5.1	4.7	0	0	4.7	5.1
	L																																					0						0
C2	W	0	0.3	4	6	8.4	8.4	0	0.3	4	6	8.4	8.4	0	0.2	4	6.2	8.83	8.58	0	0.25	4.8	7	10	10.18	0	0.4	4.8	7	10	10.25	0	0.4	4.8	7	10	10.25	0	0.3	5	7.2	11.4	11.6	0	0.3	5	7.2	11.4	11.6
	H	4.3	4	0	0	2.8	4.3	4.3	4	0	0	2.8	4.3	4.7	3.7	0	0	3	4.7	5	4.5	0	0	4.7	5	5	3.6	0	0	4.5	5	5	3.6	0	0	4.5	5	5.1	1.6	0	0	3.7	5.1	5.1	1.6	0	0	3.7	5.1
	L	2.4						2.4																														2.4						2.4
C3	W	0	0.4	2	4	7.6	7.7	0	0.4	2	4	7.6	7.7	0	0.2	2	4.3	8.1	8.3	0	0.3	2.2	5	8.6	8.7	0	1	2.3	5	8.5	8.7	0	1	2.3	5	8.5	8.7	0	0.2	2.8	5.8	8.8	9	0	0.2	2.8	5.8	8.8	9
	H	4	3.6	0	0	3	4	4	3.6	0	0	3	4	4.5	4	0	0	3.45	4.5	4.7	4	0	0	3.8	4.7	4.7	2	0	0	3.3	4.7	4.7	2	0	0	3.3	4.7	4.7	3.7	0	0	4.2	4.7	4.7	3.7	0	0	4.2	4.7
	L	2.5						2.5																														2.5						2.5
C4	W	0	0.1	1	2.8	3.9	4	0	0.1	3	4.2	6.5	6.7	0	0.2	3	4.7	8	8.19	0	0.2	4.3	6.1	10.3	10.4	0	0.3	5	7	11.1	11.3	0	0.3	5	7	11.1	11.3	0	0.3	5	7	11.9	12	0	0.3	5	7	11.9	12
	H	3.6	3	0	0	2.8	3.6	3.6	3	0	0	2.8	3.6	4.2	3.3	0	0	3.6	4.2	4	3.4	0	0	3.2	4	4.6	3.3	0	0	4	4.6	4.6	3.3	0	0	4	4.6	4.7	4	0	0	3.8	4.7	4.7	4	0	0	3.8	4.7
	L	2.5						2.5																														2.5						2.5
C5	W	0	0.1	1.5	2.5	3.9	4	0	0.1	2.5	3	5.2	6	0	0.2	3	4	8	8.2	0	0.2	4	5.4	10.3	10.4	0	0.23	4.8	6.2	11	11.3	0	0.23	4.8	6.2	11	11.3	0	0.4	5.6	7	11.7	12	0	0.4	5.6	7	11.7	12
	H	1.8	0.6	0	0	0.4	1.8	1.8	0.6	0	0	0.4	1.8	2.2	0.85	0	0	1	2.2	3	1.3	0	0	2	3	3.3	1	0	0	1.4	3.3	3.3	1	0	0	1.4	3.3	3.7	2.4	0	0	2.6	3.7	3.7	2.4	0	0	2.6	3.7
	L	8						8																														8						8
C6	W													0	0.1	0.6	2	2.9	3	0	0.2	1	2.8	3.6	3.8	0	0.3	1	3	3.7	4	0	0.3	1	3	3.7	4	0	0.3	1.3	4.5	5.4	5.7	0	0.3	1.3	4.5	5.4	5.7
	H													1	0.2	0	0	0.1	1	1.4	0.4	0	0	0.6	1.4	1.6	1	0	0	0.9	1.6	1.6	1	0	0	0.9	1.6	1.6	0.9	0	0	1	1.6	1.6	0.9	0	0	1	1.6
	L													5.4																								5.4						5.4
C7	W																			0	0.1	0.8	1.8	2.7	2.8	0	0.2	0.8	2.4	2.8	3	0	0.2	0.8	2.4	2.8	3	0	0.6	1	2.9	3.1	3.2	0	0.6	1	2.9	3.1	3.2
	H																			1.3	0.2	0	0	0.3	1.3	1.5	0.6	0	0	0.9	1.5	1.5	0.6	0	0	0.9	1.5	1.7	0.8	0	0	0.4	1.7	1.7	0.8	0	0	0.4	1.7
	L																			10																		10						10
C8	W																									0	0.1	1	2.1	2.9	3	0	0.1	1	2.1	2.9	3.5	0	0.2	1	2.3	2.8	3	0	0.2	1	2.3	2.8	3
	H																									1.2	0.2	0	0	0.1	1.2	1.2	0.2	0	0	0.1	1.6	1.8	0.8	0	0	1	1.8	1.8	0.8	0	0	1	1.8
	L																									6						6						6						6
C9	W																																					0	0.1	0.6	1	1.3	1.4	0	0.1	0.6	1	1.3	1.4
	H																																					1.2	0	0	0	0	1.8	1.2	0	0	0	0	1.8
	L																																					3						3
		-1.6	-9	0	11.61	8.57	27.6	-1.6	-10.8	0	11.61	8.56	28.8	-2.88	-14.28	0	19.61	8.72	42.24	-2.5	-22.08	0	24.2	5.44	49.5	-1.715	-19.2	0	21	10	50.96	-1.715	-19.2	0	21	10	50.96	-2.04	-22.09	0	28.2	2.05	58.65	-2.04	-22.09	0	28.2	2.05	58.65
		-1.29	-16	0	16.8	12.6	36.12	-1.29	-16	0	16.8	12.6	36.12	-0.94	-14.8	0	18.6	15.761	40.326	-1.25	-21.6	0	32.9	2.154	50.9	-2	-17.28	0	31.5	3.875	51.25	-2	-17.28	0	31.5	3.875	51.25	-1.53	-8	0	26.64	15.22	59.16	-1.53	-8	0	26.64	15.22	59.16
		-1.6	-7.2	0	12	7.3	30.8	-1.6	-7.2	0	12	7.3	30.8	-0.9	-8	0	14.835	7.815	37.35	-1.41	-8.8	0	19	7.36	40.89	-4.7	-4.6	0	16.5	11.24	40.89	-4.7	-4.6	0	16.5	11.24	40.89	-0.94	-10.36	0	24.36	3.56	42.3	-0.94	-10.36	0	24.36	3.56	42.3
		-0.36	-3	0	7.84	2.84	14.4	-0.36	-9	0	11.76	4.64	24.12	-0.84	-9.9	0	16.92	4.116	34.398	-0.8	-14.62	0	19.52	7.92	41.6	-1.38	-16.5	0	28	5.86	51.98	-1.38	-16.5	0	28	5.86	51.98	-1.41	-20	0	26.6	10.33	56.4	-1.41	-20	0	26.6	10.33	56.4
		-0.18	-0.9	0	1	5.42	7.2	-0.18	-1.5	0	1.2	6.96	10.8	-0.44	-2.55	0	4	9.4	18.04	-0.6	-5.2	0	10.8	10.1	31.2	-0.759	-4.8	0	8.68	20.48	37.29	-0.759	-4.8	0	8.68	20.48	37.29	-1.48	-13.44	0	18.2	12.09	44.4	-1.48	-13.44	0	18.2	12.09	44.4
		0	0	0	0	0	0	0	0	0	0	0	0	-0.1	-0.12	0	0.2	2.6	3	-0.28	-0.4	0	1.68	2.76	5.32	-0.48	-1	0	2.7	2.32	6.4	-0.48	-1	0	2.7	2.32	6.4	-0.48	-1.17	0	4.5	2.94	9.12	-0.48	-1.17	0	4.5	2.94	9.12
		0	0	0	0	0	0	0	0	0	0	0	0	0	0	0	0	0	0	-0.13	-0.16	0	0.54	2.67	3.64	-0.3	-0.48	0	2.16	1.5	4.5	-0.3	-0.48	0	2.16	1.5	4.5	-1.02	-0.8	0	1.16	3.99	5.44	-1.02	-0.8	0	1.16	3.99	5.44
		0	0	0	0	0	0	0	0	0	0	0	0	0	0	0	0	0	0	0	0	0	0	0	0	-0.12	-0.2	0	0.21	3.18	3.6	-0.12	-0.2	0	0.21	4.29	4.2	-0.36	-0.8	0	2.3	2.04	5.4	-0.36	-0.8	0	2.3	2.04	5.4
		0	0	0	0	0	0	0	0	0	0	0	0	0	0	0	0	0	0	0	0	0	0	0	0	0	0	0	0	0	0	0	0	0	0	0	0	-0.12	0	0	0	2.34	1.68	-0.12	0	0	0	2.34	1.68
		2013-06-28	2013-07-23	2013-08-05	2013-08-13	2013-08-30									2014-10-18
C1	W	4	8.2	10.4	11.3	12									0					2.7
	H	1.8	2.2	3	3.3	3.7									1.9					1.9
	L	8	13.4	23.4	29.4	32.4									3
C2	W														0					3.5
	H														1.55					1.55
C3	L														4
	W														0					3.3
	H														1.85					1.85
	L
[truncated: 26 more columns]

## Sheet: G9
																															1.54025		2013-06-28	2013-07-23	2013-08-05	2013-08-09	2013-08-31
																																	CROSS-SECTIONAL AREA (m2)					VOLUME (m3)
					2013-06-28					2013-07-23						2013-08-05						2013-08-13						2013-08-30					2013-06-28	2013-07-23	2013-08-05	2013-08-09	2013-08-30	2013-06-28	2013-07-23	2013-08-05	2013-08-09	25/12/2005
		S1	S2	S3	S4	S5	S6	S1	S2	S3	S4	S5	S6	S1	S2	S3	S4	S5	S6	S1	S2	S3	S4	S5	S6	S1	S2	S3	S4	S5	S6		CSA1	CSA2	CSA3	CSA4	CSA5	V1	V2	V3	V4	V5		W	L
C1	W																			-0.8	-0.8	-0.8	0.8	0.8	0.8	-1.3	-1.2	-0.8	0.9	1.2	1.3	C3	0	0	0	2.56	7.275						C3	2.6	3.8
	H																			0	-1.6	-1.6	-1.6	-1.6	0	0	-2.5	-3	-3	-2.5	0	C2	2.8	6.72	10.614	16.755	18.48				36.6985	48.9345	C2	6.3	2.4
	L																									3.8						C1	11.48	15.849	18.205	17.233	18.76	17.136	27.0828	34.5828	40.7856	44.688	C1	6.1
C2	W	-1.2	-1.2	-1.2	0.55	0.55	0.55	-1.4	-1.2	-0.7	0.7	1.1	1.17	-2.2	-1.95	-0.7	0.85	1.42	1.6	-3.1	-2.9	-1.1	1.1	2.45	2.7	-3.1	-2.9	-1.4	1.4	2.9	3.2		14.28	22.569	28.819	36.548	44.515	17.136	27.0828	34.5828	77.4841	93.6225	94.088
	H	0	-1.6	-1.6	-1.6	-1.6	0	0	-2	-3	-3	-2	0	0	-2	-3.4	-3.4	-2	0	0	-2	-3.4	-3.4	-2.4	0	0	-2	-3.4	-3.4	-2.4	0						30.235					76.4865	77.288
	L																									2.4
C3	W	-2.39	-2.1	-0.7	0.7	2.65	2.95	-2.39	-2.1	-0.7	0.7	2.65	2.95	-2.95	-2.75	-0.9	0.9	2.8	3.05	-2.95	-2.75	-0.9	0.9	2.8	3.07	-3	-2.8	-1.1	1.1	2.8	3.1
	H	0	-1	-2.8	-2.8	-1.8	0	0	-1.2	-3.8	-3.8	-2.8	0	0	-1.2	-3.8	-3.8	-2.8	0	0	-1.3	-3.5	-3.5	-2.8	0	0	-1.2	-3.8	-3.8	-2.8	0				ave depth =		-3.4
	L																									0
		0	0	0	0	0	0	0	0	0	0	0	0	0	0	0	0	0	0	1.28	0	2.56	0	1.28	0	3.25	1.6	5.1	1.35	3.25	0	0	0	0	2.56	7.275
		1.92	0	2.8	0	0.88	0	2.8	2.2	4.2	1.9	2.34	0	4.4	5.23	5.27	3.128	3.2	0	6.2	7.66	7.48	5.69	6.48	0	6.2	7.06	9.52	6.5	7.68	0	2.8	6.72	10.614	16.755	18.48
		2.39	5.18	3.92	6.16	5.31	0	2.868	7.14	5.32	8.11	8.26	0	3.54	9.37	6.84	8.12	8.54	0	3.835	8.455	6.3	7.28	8.596	0	3.6	9.32	8.36	7.56	8.68	0	11.48	15.849	18.205	17.233	18.76
		2013-06-28	2013-07-23	2013-08-05	2013-08-13	2013-08-30							2014-10-18
C1	W	1.75	2.57	3.8	5.8	6.3						0					3
	H	-1.6	-3	-3.4	-3.4	-3.4						4.2					4.2
	L	2.4	2.4	2.4	6.2	6.2						1.65
C2	W											0					4.3
	H											4.5					4.5
	L											0

## Sheet: G10
																									1.54025		2013-06-28	2013-07-23	2013-08-05	2013-08-09	2013-08-31
																											CROSS-SECTIONAL AREA (m2)					VOLUME (m3)
				2013-06-28						2013-08-05						2013-08-13						2013-08-30					2013-06-28	2013-07-23	2013-08-05	2013-08-09	2013-08-30	2013-06-28	2013-07-23	2013-08-05	2013-08-09	25/12/2005					CHANNAL LENGTH (m)	VOLUME (m3)	DEPTH (m)	WIDTH (m)	WATER TABLE DEPTH
		S1	S2	S3	S4	S5	S6	S1	S2	S3	S4	S5	S6	S1	S2	S3	S4	S5	S6	S1	S2	S3	S4	S5	S6		CSA1	CSA2	CSA3	CSA4	CSA5	V1	V2	V3	V4	V5		W	L	C1	0		-5.1	11.5
C3	W																			-1.5	-1.5	-1.5	1.5	1.5	1.5	C3	0	0	0	0	6.9						C3	3	0.7	C2	2.4	99.3976	-5.1	11.6
	H																			0	-2.3	-2.3	-2.3	-2.3	0	C2	9.339	9.339	10.203	10.212	10.23					5.9955	C2	4.6	3	C3	4.9	97.6392	-4.7	9	-2.01
	L																			0.7						C1	14.588	14.588	14.686	14.686	14.72	35.8905	35.8905	37.3335	37.347	37.425	C1	6.4		C4	7.4	100.227	-4.7	12	-2.42
C2	W	-1.83	-1.8	-0.9	0.9	2.1	2.3	-2.27	-2.1	-0.9	0.9	2.1	2.3	-2.28	-2.1	-0.9	0.9	2.1	2.3	-2.3	-2.1	-0.9	0.9	2.1	2.3		23.927	23.927	24.889	24.898	31.85	35.8905	35.8905	37.3335	37.347	43.4205				43.59
	H	0	-1.6	-2.5	-2.5	-2.1	0	0	-1.8	-2.5	-2.5	-2.1	0	0	-1.8	-2.5	-2.5	-2.1	0	0	-1.8	-2.5	-2.5	-2.1	0											7.53				7.59
	L																			3											7.923
C1	W	-3.05	-3	-1	1	3	3.17	-3.19	-3	-1	1	3	3.17	-3.19	-3	-1	1	3	3.17	-3.2	-3	-1	1	3	3.2
	H	0	-1.4	-2.8	-2.8	-1.8	0	0	-1.4	-2.8	-2.8	-1.8	0	0	-1.4	-2.8	-2.8	-1.8	0	0	-1.4	-2.8	-2.8	-1.8	0		ave depth =		-2.53333
	L																			0
		0	0	0	0	0	0	0	0	0	0	0	0	0	0	0	0	0	0	3.45	0	6.9	0	3.45	0			0	0	0	6.9
		2.928	3.06	4.5	3.36	4.83	0	4.086	3.63	4.5	3.36	4.83	0	4.104	3.63	4.5	3.36	4.83	0	4.14	3.63	4.5	3.36	4.83	0			9.339	10.203	10.212	10.23
		4.27	7	5.6	6.6	5.706	0	4.466	7	5.6	6.6	5.706	0	4.466	7	5.6	6.6	5.706	0	4.48	7	5.6	6.6	5.76	0			14.588	14.686	14.686	14.72
		2013-06-28	2013-08-05	2013-08-13	2013-08-30
C1	W	4.13	4.57	4.58	4.6
	H	-2.5	-2.5	-2.5	-2.5
	L	3	3	3	3.7

[truncated: 10 more sheets: G11, G12, G13, summary, Headcut depths, RF VS L, RF vs L,W,D, summary 1, CORRELations, porewater]
