# Supplementary material for: Morphological dynamics of gully systems in the sub-humid Ethiopian Highlands: The Debre Mawi watershed
Source: Copernicus journal article supplement (doi:10.5194/soil-2016-13), 2016-03-10
Supplement: Supplementary file 2 [file 13 Gully headcut retreat_DM_2014.xlsx]

## Sheet: G1
	2014-10-18
C1	W	No change
	H
	L
																						2.6

## Sheet: G2
									previous year final
				2014-10-18					2013-08-30		2014-10-18
		S1	S2	S3	S4	S5	S6		CSA	V	CSA	V
C4	W	0	0.3	0.4	1.2	1.4	1.6	C4			1.825
	H	1.3	0	0	0	0	1.4	C3	5.4275		5.4275	1.81313
	L	0.5						C2	10.33	17.3333	10.33	17.3333
C3	W	-1.6	-1.4	-0.6	0.6	1.5	1.7	C1	11.95	21.166	11.95	21.166
	H	0	-0.9	-2.2	-2.2	-0.85	0	TOTAL	27.7075	38.4993	29.5325	40.3124
	L	2.2
C2	W	-2.5	-2.3	-0.9	1	2.4	2.6
	H	0	-1.2	-2.5	-2.5	-1.4	0				0.8
	L	1.9
C1	W	-3.6	-3.45	-1	1.2	3.5	3.7
	H	0	-1	-2	-2	-1.2	0
	L	0
		-0.39	0	0	0	1.96	2.08	1.825
		1.44	2.54	2.64	2.79	1.445	0	5.4275
		3	4.67	4.75	4.6	3.64	0	10.33
		3.6	5.9	4.4	5.56	4.44	0	11.95

## Sheet: G3
							1.54025				2013-08-31
				2014-10-18					2013-08-30		2014-10-18
		S1	S2	S3	S4	S5	S6		CSA5	V5	CSA5	V5
C6	W	-1.1	-0.5	-0.5	0.5	0.5	0.6	C6	0.955		1.08
	H	0	-0.5	-0.9	-0.9	-0.6	0	C5	1.62	19.3125	1.71	20.925
	L	15						C4	2.615	21.175	2.915	23.125
C5	W	-1.1	-0.9	-0.9	0.9	0.9	0.9	C3	12.105	7.36	12.105	7.51
	H	0	-0.9	-0.9	-0.9	-0.9	0	C2	7.61	98.575	7.79	99.475
	L	10						C1	8.79	67.24	8.79	67.978
C4	W	-1.8	-1.1	-1	1	1.2	1.3
	H	0	-1	-1.1	-1.1	-1	0
	L	1						TOTAL	33.695	213.663	34.39	219.013
C3	W	-3.5	-3.3	-2.5	2.5	3.4	3.6
	H	0	-1.5	-1.8	-1.8	-1.5	0
	L	10
C2	W	-3.4	-2.6	-1	1	2.5	2.7
	H	0	-0.6	-1.8	-1.8	-0.8	0
	L	8.2
C1	W	-3	-2.8	-1.5	1.5	2.8	3
	H	0	-0.6	-1.8	-1.8	-0.8	0
	L	0
		0.55	0.2	0.9	0.15	0.36	0	1.08
		0.99	0	1.62	0	0.81	0	1.71
		1.8	0.21	2.2	0.32	1.3	0	2.915
		5.25	2.19	9	2.37	5.4	0	12.105
		2.04	4.08	3.6	3.7	2.16	0	7.79
		1.8	4.14	5.4	3.84	2.4	0	8.79

## Sheet: G4
							1.54025
									CROSS-SECTIONAL AREA (m2)
				2013-08-30					2013-08-30		2014-10-18
		S1	S2	S3	S4	S5	S6		CSA	V	CSA	V
C5	W	0	0.2	0.4	2.9	3.1	3.3	C5			6.08
	H	2	0.3	0	0	0.3	2	C4	2.25		2.25	20.825
	L	5						C3	6.98	11.999	6.98	11.999
c4	W	-0.75	-0.75	-0.75	0.75	0.75	0.75	C2	11.325	40.271	11.325	40.271
	H	0	-1.5	-1.5	-1.5	-1.5	0	C1	13.17	14.697	13.17	14.697
	L	2.6						TOTAL	33.725	66.967	39.805	87.792
c3	W	-2.4	-2.2	-0.8	0.8	2.2	2.4
	H	0	-0.8	-1.9	-1.9	-0.8	0
	L	4.4
c2	W	-3.1	-2.9	-0.8	0.9	2.9	3.1				16.5
	H	0	-1.2	-2.3	-2.3	-1.2	0
	L	1.2
c1	W	-3.2	-3	-1.4	1.4	3.3	3.5
	H	0	-1.1	-2.4	-2.4	-1.2	0
	L	0
		-0.4	-0.12	0	0.87	5.21	6.6	6.08
		1.125	0	2.25	0	1.125	0	2.25
		1.92	3.54	3.04	3.54	1.92	0	6.98
		3.72	5.71	3.91	5.59	3.72	0	11.325
		3.52	5.66	6.72	6.24	4.2	0	13.17

## Sheet: G5
							1.54025
				2014-10-18					previou year		2014-10-18
		S1	S2	S3	S4	S5	S6				CSA	V
C1	W	-9.3	-8.7	-4	5	9	9.2	C1			43.64
	H	0	-0.8	-3	-3	-0.7	0	C2			96.05	174.613
	L	2.5						C3			112.22	781.012
C2	W	-12.2	-11.7	-2.9	3	12	12.8	C4			98.64	548.236
	H	0	-2	-5.1	-5.1	-2.3	0	C5			56.6	357.052
	L	7.5						C6			30.88	131.22
C3	W	-15	-14.5	-1.8	1.8	15.7	17	TOTAL	350.55	1503.86	438.03	1992.13
	H	0	-1	-5.8	-5.8	-1	0
	L	5.2
C4	W	-15	-14.7	-1.8	1.8	14.7	15.5
	H	0	-1	-5.08	-5.08	-1.2	0
	L	4.6
C5	W	0	2.4	5	13	14	14.3
	H	5	3	0	0	1	5
	L	3
C6	W	0	2	3	7	9	10.2
	H	4.3	3	0	0	1	4.3
	L	0
		7.44	22.9	27	23.5	6.44	0	43.64
		24.4	53.87	30.09	54.3	29.44	0	96.05
		15	82.3	20.88	89.26	17	0	112.22
		15	72.876	18.288	72.516	18.6	0	98.64
		-12	-15	0	13	55.7	71.5	56.6
		-8.6	-9	0	7	28.5	43.86	30.88
				0

## Sheet: G6
						11.0476
				2014-10-18					2013-09-18		2014-10-18
		S1	S2	S3	S4	S5	S6		CSA6	V6	CSA	V
C22	W	0	5	5.5	13	15	16	C22			61.1	0
	H	5.3	1.8	0	0	1.9	5.3	C21			39.335	72.6022
	L	0						C20	8.015	3.3045	29.81	6.9565
C21	W	0	3	3.5	9.3	10	13	C19	25.03	69.0365	39.755	90.519
	H	4.6	1.8	0	0	1.9	4.6	C18	28.075	89.862	29.875	95.642
	L	2.1						C17	24.785	178.077	26.385	184.124
C20	W	0	0.1	1.5	2.4	2.9	13	C16	35.58	156.681	36.03	161.868
	H	4.3	0.6	0	0	0.7	4.3	C15	40.85	99.8372	42.93	104.023
	L	0.2						C14	45.965	67.854	47.525	70.47
C19	W	0	0.2	4.7	5.5	7.7	12	C13	67.125	307.504	69.925	321.694
	H	5	1.2	0	0	1.9	5	C12	75.9	1343.22	79.7	1369.76
	L	2.6						C11	135.63	1882.62	136.01	1919.82
C18	W	0	0.2	4.5	5.5	9	12.3	Sub T	486.955	4197.99	638.38	4397.48	151.425	199.488
	H	4.3	2.2	0	0	3.1	4.3	C10	77.18	2872.93	77.18	2878.07
	L	3.4						C9	101.955	3134.86	103.075	3154.46
C17	W	0	0.2	4.3	5.9	9.7	12	C8	115	2169.55	115.875	2189.5
	H	3.1	1.1	0	0	1.5	3.1	C7	75.395	5331.06	75.795	5366.76
	L	5.9						C6	109.89	1602.72	113.49	1637.32
C16	W	0	2	6	7.6	11.5	13.5	C5	22.14	871.398	24.74	912.318
	H	4.4	2.3	0	0	2.6	4.4	C4	13.92	104.574	13.92	112.114
	L	4.1						C3	20.675	287.139	20.675	287.139
C15	W	0	2	6.5	7.7	11	15	C2	17.835	658.521	17.835	658.521
	H	4.9	2.3	0	0	2.3	4.9	C1	9.605	310.072	9.605	310.072
	L	2.3						Sub T	563.595	17342.8	572.19	17506.3	8.595	163.44
C14	W	0	1.8	6	7.2	10.5	14.6	Total	1050.55	21540.8	1210.57	21903.7	160.02	362.928
	H	5.9	3	0	0	3.3	5.9
	L	1.2										362.928
C13	W	0	2.3	6.7	8.7	12.8	18
	H	5.8	1.3	0	0	1.8	5.8
	L	4.3
C12	W	0	2.8	8	9.3	15.6	19
	H	6	1.5	0	0	2	6
	L	12.7
C11	W	0	3	15.6	17.6	29.4	34.2	16.05
	H	6.6	3.2	0	0	4.7	6.6	5.01667
	L	17.8
C10		0	10	15.6	18.6	24	35
		4.2	1.3	0	0	1.9	4.2
		27
C9		0	8	14.9	17.5	25	34
		5.5	2	0	0	2.7	5.5
		35
C8		0	0.4	20	28.7	37.6	41
		4.6	4	0	0	3.9	4.6
		20
C7		0	1.6	9.8	12.6	22.7	24
		5.1	3	0	0	4.3	5.1
		56
C6		0	11	15.3	17.6	21	33
		6.6	1.6	0	0	2.1	6.6
		17.3
C5		0	1	4.2	6.3	8.1	11
		3	0.7	0	0	0.4	3
		13.2
C4		0	2	3.4	5.7	7	8.6
		2.3	0.5	0	0	0.6	2.3
		5.8
C3		0	5	6.5	8.5	10	14
		2.4	0.4	0	0	0.3	2.4
		16.6
C2		0	2.9	3.5	6	7.2	9
		2.9	0.4	0	0	0.5	2.9
		34.2
C1		0	5	5.8	7.5	8.2	12.4
		1.4	0.2	0	0	0.3	1.4
		22.6
C22		-26.5	-9.9	0	24.7	49.1	84.8	61.1
C21		-13.8	-6.3	0	17.67	21.3	59.8	39.335
C20		-0.43	-0.9	0	1.68	3.37	55.9	29.81
C19		-1	-5.64	0	10.45	15.7	60	39.755
C18		-0.86	-9.9	0	17.05	0.57	52.89	29.875
C17		-0.62	-4.73	0	8.85	12.07	37.2	26.385
C16		-8.8	-13.8	0	19.76	15.5	59.4	36.03
C15		-9.8	-14.95	0	17.71	19.4	73.5	42.93
C14		-10.62	-18	0	23.76	13.77	86.14	47.525
C13		-13.34	-8.71	0	15.66	41.84	104.4	69.925
C12		-16.8	-12	0	18.6	55.6	114	79.7
C11		-19.8	-49.92	0	82.72	33.3	225.72	136.01
C10		-42	-20.28	0	35.34	34.3	147	77.18
C9		-44	-29.8	0	47.25	45.7	187	103.075
C8		-1.84	-80	0	111.93	13.06	188.6	115.875
C7		-8.16	-29.4	0	54.18	12.57	122.4	75.795
C6		-72.6	-24.48	0	36.96	69.3	217.8	113.49
C5		-3	-2.94	0	2.52	19.9	33	24.74
C4		-4.6	-1.7	0	3.42	10.94	19.78	13.92
C3		-12	-2.6	0	2.55	19.8	33.6	20.675
C2		-8.41	-1.4	0	3	16.38	26.1	17.835
C1		-7	-1.16	0	2.25	7.76	17.36	9.605

## Sheet: G7
	has no change

## Sheet: G8
							1.54025
				2014-10-18					2013-08-30		2014-10-18
		S1	S2	S3	S4	S5	S6		CSA5	V5	CSA5	V5
C1	W	0	0.4	4.7	6	11	13	C1	32.385		43.305
	H	6	4.7	0	0	4.7	6	C2	45.745	93.756	50.915	113.064
	L	0						C3	29.46	94.0062	32.5	104.269
C2	W	0	0.3	5	7.2	11.4	12.3	C4	35.96	81.775	40.1	90.75
	H	5.5	1.6	0	0	3.7	5.5	C5	29.885	263.38	33.38	293.92
	L	2.4						C6	7.455	100.818	8.655	113.495
C3	W	0	0.2	2.8	5.8	8.8	10	C7	4.385	59.2	4.905	67.8
	H	5	3.7	0	0	4.2	5	C8	4.29	26.025	4.49	28.185
	L	2.5						C9			2.82	10.965
C4	W	0	0.3	5	7	11.9	13	C10			5.1575	15.955
	H	5	4	0	0	3.8	5	C11			4.6025	14.64
	L	2.5							189.565	718.96	230.83	853.042
C5	W	0	0.4	5.6	7	11.7	12
	H	4	2.4	0	0	2.6	4
	L	8
C6	W	0	0.3	1.3	4.5	5.4	6
	H	1.8	0.9	0	0	1	1.8
	L	5.4
C7	W	0	0.6	1	2.9	3.1	4
	H	1.7	0.8	0	0	0.4	1.7
	L	10
C8	W	0	0.2	1	2.3	2.8	3.5
	H	1.8	0.8	0	0	1	1.8
	L	6
C9	W	0	0.1	0.6	1	1.3	3.5
	H	1.2	0	0	0	0	1.2
	L	3
C10	W	0	0.5	1.1	2.9	3.1	3.3
	H	1.85	0.4	0	0	0.4	1.85
	L	4
C11	W	0	0.3	0.6	3	3.1	3.5
	H	1.55	0.6	0	0	0.4	1.55
	L	3
	C1	-2.4	-22.09	0	28.2	4.9	78	43.305
	C2	-1.65	-8	0	26.64	17.19	67.65	50.915
	C3	-1	-10.36	0	24.36	2	50	32.5
	C4	-1.5	-20	0	26.6	10.1	65	40.1
	C5	-1.6	-13.44	0	18.2	15.6	48	33.38
	C6	-0.54	-1.17	0	4.5	3.72	10.8	8.655
	C7	-1.02	-0.8	0	1.16	3.67	6.8	4.905
	C8	-0.36	-0.8	0	2.3	1.54	6.3	4.49
	C9	-0.12	0	0	0	1.56	4.2	2.82
	C10	-0.925	-0.44	0	1.16	4.415	6.105	5.1575
	C11	-0.465	-0.36	0	1.2	3.405	5.425	4.6025
	C12	#REF!	#REF!	#REF!	#REF!	#REF!	#REF!	#REF!

## Sheet: G9
							1.54025				2013-08-31
				2014-10-18					2013-08-30		2014-10-18
		S1	S2	S3	S4	S5	S6		CSA5	V5	CSA5	V5
C1	W	-1.3	-1.2	-0.8	0.9	1.2	1.3	C3	7.275		7.275
	H	0	-2.5	-3	-3	-2.5	0	C2	18.48	48.9345	18.48	48.9345
	L	3.8						C1	18.76	44.688	18.76	44.688
C2	W	-3.1	-2.9	-1.4	1.4	2.9	3.2				18.07	44.196
	H	0	-2	-3.4	-3.4	-2.4	0				11.565	24.4489
	L	2.4						Total	44.515	93.6225	74.15	162.267
C3	W	-3	-2.8	-1.1	1.1	2.8	3.1
	H	0	-1.2	-3.8	-3.8	-2.8	0
	L	2.4
C4	W	0	0.2	0.4	3.8	4.1	4.3
	H	4.5	0.9	0	0	0.8	4.5
	L	1.65
C5	W	0	0.2	0.4	2.7	2.8	3
	H	4.2	0.6	0	0	0.5	4.2
	L	0
		3.25	1.6	5.1	1.35	3.25	0	7.275
		6.2	7.06	9.52	6.5	7.68	0	18.48
		3.6	9.32	8.36	7.56	8.68	0	18.76
		-0.9	-0.36	0	3.04	15.01	19.35	18.07
		-0.84	-0.24	0	1.35	10.26	12.6	11.565

## Sheet: G10
		2014-10-18
			No change
C3	W
	H
	L
C2	W
	H
	L
C1	W
	H
	L

[truncated: 4 more sheets: G11, G12, G13, summary]
