# Supplementary material for: Morphological dynamics of gully systems in the sub-humid Ethiopian Highlands: The Debre Mawi watershed
Source: Copernicus journal article supplement (doi:10.5194/soil-2016-13), 2016-03-10
Supplement: Supplementary file 3 [file 13 gullies water table 2013.xlsx]

## Sheet: Sheet1
	G1		G2		G3		G4		G5		G6		G7		G8		G9		G10		G11		G12		G13
	MOR	NIGHT	MOR	NIGHT	MOR	NIGHT	MOR	NIGHT	MOR	NIGHT	MOR	NIGHT	MOR	NIGHT	MOR	NIGHT	MOR	NIGHT	MOR	NIGHT	MOR	NIGHT	MOR	NIGHT	MOR	NIGHT
2013-07-25	2.02	1.95	1.95	1.95	1.67	1.67	1.85	1.85	1.45	1.45	0.16	0.17	2.74	2.74	1.88	1.89	1.8	1.8	1.44	1.54	0.48	0.46	1.49	1.47	1.7	1.68
2013-07-26	1.81	1.75	2.07	2.1	1.62	1.5	2.19	2.07	1.4	1.28	0.08	0.11	2.47	2.45	0.1	0.48	1.8	1.8	1.44	1.55	0.72	0.72	2.72	2.72	1.7	1.7
2013-07-27	1.68	1.58	2.11	2.1	1.41	1.4	1.98	1.97	1.19	1.18	0.17	0.16	1.86	1.93	0.06	0.52	1.8	1.8	1.49	1.56	0.45	0.44	2.56	2.55	1.71	1.7
2013-07-28	1.54	1.61	2.12	2.06	1.32	1.43	1.89	2	1.1	1.21	0.09	0.18	1.93	1.91	0.17	0.16	1.8	1.8	1.78	1.56	0.63	0.64	2.6	2.61	1.76	1.77
2013-07-29	1.64	1.8	1.82	1.4	1.25	1.4	1.82	1.97	1.03	1.18	0.19	0.32	2.01	2.16	0.1	0.77	1.8	1.8	1.59	1.51	0.47	0.45	2.57	2.55	1.74	1.72
2013-07-30	1.75	1.77	1.35	1.37	1.27	1.12	1.84	1.69	1.05	0.9	0.31	0.34	2.17	2.26	0.57	1.17	1.8	1.8	1.8	1.54	0.5	0.5	2.59	2.59	1.77	1.77
2013-07-31	1.77	1.82	1.69	1.34	1.18	1.03	1.75	1.6	0.96	0.81	0.29	0.35	2.18	2.24	0.89	0.94	1.6	1.5	1.88	1.73	0.76	0.75	2.12	2.11	1.76	1.75
2013-08-01	1.7	1.6	2.14	1.52	1.09	0.94	1.66	1.51	0.87	0.72	0.3	0.32	2.28	2.31	1.29	0.7	1.3	1.2	1.75	1.73	0.71	0.72	1.56	1.57	1.71	1.72
2013-08-02	1.5	1.6	2.02	1.52	1.02	1.02	1.59	1.59	0.8	0.8	0.33	0.32	2.36	2.36	1.38	1	1.2	1.2	1.63	1.63	0.56	0.54	2.56	2.54	1.74	1.72
2013-08-03	1.6	1.88	1.98	1.55	0.93	0.75	1.5	1.32	0.71	0.53	0.27	0.33	2.18	2.23	1.17	1.24	1.65	1.62	1.7	1.78	0.73	0.73	1.78	1.78	1.74	1.74
2013-08-04	1.81	1.7	1.87	1.33	0.8	0.77	1.37	1.34	0.58	0.55	0.19	0.2	2.15	2.19	1.35	1.32	1.59	1.54	1.44	1.89	0.78	0.77	1.64	1.63	1.72	1.71
2013-08-05	1.6	1.77	1.79	1.26	0.78	0.74	1.35	1.31	0.56	0.52	0.18	0.18	2.15	2.06	1.27	1.27	1.51	1.5	2.03	2.16	0.63	0.64	1.87	1.88	1.75	1.76
2013-08-06	1.82	1.8	1.81	1.37	0.64	0.71	1.21	1.28	0.42	0.49	0.13	0.19	2.18	2.21	1.29	0.6	1.45	1.44	2.17	2.19	0.71	0.69	1.92	1.9	1.74	1.72
2013-08-07	1.8	1.8	1.98	1.48	0.57	0.57	0.78	0.78	0.67	0.67	0.21	0.18	2.24	2.24	1.38	1	1.43	1.43	2.23	2.23	0.74	0.74	1.67	1.67	1.73	1.73
2013-08-08	1.78	1.7	1.65	1.2	0.56	0.73	0.73	0.75	0.65	0.63	0.23	0.27	1.93	2.01	1.02	1.29	1.33	1.3	2.52	2.51	0.75	0.74	1.57	1.56	1.75	1.74
2013-08-09	1.9	1.9	1.65	1.25	0.52	0.52	0.79	0.79	0.64	0.64	0.25	0.27	1.56	1.56	1.29	1.48	1.27	1.27	2.76	2.76	0.72	0.73	1.57	1.58	1.77	1.78
2013-08-10	1.6	1.6	1.68	1.22	0.52	0.52	0.77	0.77	0.5	0.5	0.27	0.22	1.94	1.94	1.3	1.89	1.24	1.24	2.79	2.79	0.81	0.79	1.69	1.67	1.74	1.72
2013-08-11	1.8	1.6	1.58	1.53	0.02	0.03	0.76	0.76	0.57	0.57	0.31	0.32	1.99	2.01	1.2	1.48	1.28	1.29	2.63	1.74	0.88	0.88	1.77	1.77	1.75	1.75
2013-08-12	1.78	1.78	1.57	1.55	0.62	0.6	0.79	0.71	0.64	0.7	0.26	0.32	2.05	2.1	1.82	1.84	1.27	1.32	2.69	2.63	0.63	0.62	1.83	1.82	1.71	1.7
2013-08-13	1.77	1.78	1.5	1.41	0.7	0.68	0.66	0.69	0.56	0.6	0.26	0.28	1.96	2	1.43	1.63	1.32	1.27	2.71	2.69	0.82	0.83	1.5	1.51	1.65	1.66
2013-08-14	1.77	1.79	1.38	1.35	0.88	0.9	0.66	0.68	0.5	0.48	0.25	0.27	2	2.01	1.7	1.68	1.3	1.34	2.68	2.73	0.83	0.81	1.69	1.67	1.76	1.74
2013-08-15	1.5	1.78	1.34	1.25	0.93	0.86	0.63	0.66	0.6	0.68	0.28	0.28	1.83	1.78	1.65	1.68	1.25	1.36	2.65	2.67	0.86	0.86	1.77	1.77	1.75	1.75
2013-08-16	1.78	1.78	1.4	1.35	0.92	0.93	0.65	0.65	0.58	0.58	0.35	0.29	2.05	2.05	1.65	1.35	1.37	1.37	2.65	2.65	0.67	0.66	1.76	1.75	1.74	1.73
2013-08-17	1.8	1.78	1.34	1.25	0.88	0.86	0.63	0.66	0.6	0.68	0.28	0.34	1.94	2.04	1.65	1.35	1.35	1.35	1.63	2.8	0.69	0.7	1.75	1.76	1.71	1.72
2013-08-18	1.79	1.78	1.38	1.31	0.89	0.87	0.69	0.65	1.19	0.61	0.36	0.33	2.01	2.04	1.65	1.35	1.38	1.36	2.72	2.72	0.9	0.88	1.92	1.9	1.74	1.72
2013-08-19	1.67	1.7	1.3	1.27	0.84	0.86	0.59	0.54	0.64	0.62	0.42	0.39	1.94	1.99	1.65	1.35	1.37	1.36	1.66	1.62	0.81	0.81	1.78	1.78	1.69	1.69
2013-08-20	1.8	1.82	1.3	1.82	0.87	0.8	0.61	0.63	0.64	0.65	0.31	0.29	1.99	2.01	1.65	1.35	1.44	1.43	2.71	2.74	1.09	1.08	1.83	1.82	1.72	1.71
2013-08-21	1.67	1.7	1.3	1.34	0.8	0.62	0.59	0.65	0.65	0.66	0.38	0.38	2.03	2.03	1.65	1.35	1.44	1.45	2.68	2.67	1.36	1.37	1.81	1.82	1.7	1.71
2013-08-22	1.73	1.74	1.37	1.33	0.59	0.49	0.59	0.66	0.67	0.67	0.4	0.4	2.06	2	1.8	1.81	1.5	1.51	2.63	2.67	1.52	1.5	1.79	1.77	1.71	1.69
2013-08-23	1.7	1.73	1.36	1.33	0.46	0.48	0.64	0.68	0.65	0.66	0.42	0.42	2.12	2.09	1.78	1.8	1.5	1.49	2.61	2.64	1.56	1.56	1.78	1.78	1.73	1.73
2013-08-24	1.76	1.78	1.4	1.36	0.52	0.5	0.69	0.67	0.6	0.62	0.42	0.43	2.07	2.07	1.7	1.73	1.48	1.5	2.63	2.61	1.56	1.55	1.76	1.75	1.73	1.72
2013-08-25	1.77	1.79	1.4	1.38	0.47	0.44	0.65	0.66	0.72	0.76	0.4	0.42	2.14	2.16	1.9	1.9	1.48	1.49	2.65	2.62	1.59	1.6	1.67	1.68	1.74	1.75
2013-08-26	1.74	1.77	1.46	1.38	0.52	0.56	0.73	0.77	0.76	0.7	0.39	0.39	2.17	2.27	1.89	1.92	1.52	1.54	2.59	2.58	1.6	1.58	1.67	1.65	1.71	1.69
2013-08-27	1.6	1.8	1.42	1.39	0.47	0.5	0.69	0.73	0.74	0.72	0.37	0.4	2.17	2.16	1.88	1.94	1.52	1.53	2.6	2.59	1.49	1.49	1.65	1.65	1.69	1.69
2013-08-28	1.83	1.83	1.45	1.39	0.45	0.49	0.69	0.72	0.78	0.77	0.4	0.42	2.16	1.96	1.94	1.94	1.52	1.54	2.59	2.59	1.67	1.66	1.62	1.61	1.75	1.74
2013-08-29	1.82	1.82	1.45	1.38	0.36	0.4	0.76	0.76	0.77	0.79	0.45	0.45	1.96	1.76	1.93	1.95	1.54	1.54	2.57	2.55	1.71	1.72	1.62	1.63	1.73	1.74
2013-08-30	1.83	1.86	1.47	1.4	0.48	0.38	0.86	0.82	0.87	0.86	0.44	0.47	2.26	2.3	1.99	2.01	1.57	1.57	2.57	2.51	1.77	1.75	1.62	1.6	1.74	1.72
2013-08-31	1.96	2	1.54	1.5	0.35	0.39	0.84	0.83	0.8	0.8	0.42	0.44	2.26	2.27	1.96	2.02	1.52	1.55	2.46	2.46	1.74	1.74	1.67	1.67	1.71	1.71
2013-09-01	1.97	1.99	1.57	1.52	0.37	0.37	0.84	0.85	0.83	0.84	0.47	0.47	2.28	2.32	1.99	2.01	1.56	1.57	2.48	2.46	1.71	1.7	1.65	1.64	1.73	1.72
2013-09-02	1.96	1.96	1.64	1.23	0.32	0.3	0.87	0.89	0.88	0.89	0.44	0.45	2.24	2.25	2.06	2.04	1.53	1.54	2.49	2.49	1.78	1.79	1.68	1.69	1.73	1.74
2013-09-03	1.91	1.86	1.61	1.5	0.28	0.11	0.79	0.69	0.83	0.84	0.4	0.47	2.21	2.11	2.01	2.01	1.52	1.48	2.52	2.53	1.9	1.88	1.68	1.66	1.73	1.71
2013-09-04	1.84	1.85	1.23	1.24	0.15	0.12	0.63	0.64	0.79	0.82	0.36	0.47	1.93	1.91	1.83	1.85	1.45	1.46	1.82	2.71	1.47	1.47	1.47	1.47	1.72	1.72
2013-09-05	1.8	1.83	1.22	1.22	0.02	0.03	0.62	0.66	0.83	0.87	0.42	0.45	1.96	2	1.85	1.88	1.42	1.45	2.51	2.49	1.1	1.09	1.38	1.37	1.74	1.73
2013-09-06	1.85	1.88	1.25	1.25	0.42	0.4	0.84	0.88	0.85	0.85	0.47	0.49	1.99	2.01	1.9	1.91	1.47	1.48	2.51	2.5	0.71	0.72	1.42	1.43	1.72	1.73
2013-09-07	1.8	1.83	1.45	1.23	0.34	0.35	0.69	0.75	0.8	0.83	0.42	0.42	1.91	1.9	1.84	1.88	1.35	1.4	2.57	2.55	1.03	1.01	1.46	1.44	1.76	1.74
2013-09-08	1.8	1.84	1.53	1.25	0.32	0.34	0.69	0.75	0.86	0.88	0.46	0.48	1.89	1.91	1.86	1.88	1.32	1.37	2.51	2.51	1.07	1.07	1.48	1.48	1.76	1.76
2013-09-09	1.86	1.86	1.4	1.35	0.52	0.52	0.71	0.71	1	1	0.47	0.48	2.06	2.06	1.92	1.6	1.4	1.4	2.61	2.61	0.94	0.93	1.49	1.48	1.73	1.72
2013-09-10	1.85	1.86	1.37	1.34	0.47	0.5	0.7	0.74	0.05	0.05	0.48	0.49	2.06	2.1	1.92	1.95	1.4	1.45	2.56	2.56	1.02	1.03	1.45	1.46	1.74	1.75
2013-09-11	1.88	1.9	1.4	1.35	0.52	0.52	0.84	0.86	0.09	0.1	0.51	0.52	2.16	2.16	1.95	2.18	1.4	1.45	2.53	2.51	1.32	1.3	1.5	1.48	1.75	1.73
2013-09-12	1.9	1.93	1.44	1.39	0.57	0.57	0.94	0.94	0.1	0.13	0.53	0.57	2.15	2.16	1.98	1.99	1.45	1.49	2.51	2.49	1.02	1.02	1.45	1.45	1.74	1.74
2013-09-13	1.92	1.95	1.5	1.45	0.62	0.62	0.99	0.99	0.15	0.2	0.57	0.58	2.21	2.23	2	2.02	1.47	1.5	2.46	2.44	1.42	1.41	1.47	1.46	1.75	1.74
2013-09-14	1.92	1.97	1.5	1.47	0.66	0.66	0.69	1.19	0.3	0.3	0.62	0.62	2.26	2.26	1.99	2.01	1.5	1.5	2.41	2.39	1.67	1.68	1.54	1.55	1.76	1.77
2013-09-15	1.93	1.95	1.52	1.49	0.66	0.66	1.19	1.19	0.35	0.35	0.32	0.72	2.26	2.28	2	2.01	1.53	1.54	2.4	2.37	1.59	1.57	1.54	1.52	1.73	1.71
2013-09-16	1.93	1.93	1.53	1.49	0.71	0.71	1.19	1.2	0.4	0.51	0.72	0.74	2.29	2.31	2.02	2.05	1.54	1.6	2.39	2.33	1.69	1.69	1.59	1.59	1.77	1.77
2013-09-17	1.94	1.97	1.55	1.54	1.63	0.75	1.22	1.24	0.55	0.65	0.75	0.8	2.33	2.33	2.08	2.13	1.58	1.63	2.36	2.31	1.66	1.65	1.72	1.71	1.75	1.74
2013-09-18	1.99	1.99	1.6	1.55	1.75	1.82	1.26	1.46	0.67	0.66	0.83	0.8	2.36	2.44	2.17	1.97	1.65	1.7	2.3	2.21	1.68	1.69	1.7	1.71	1.76	1.77
Min	1.5	1.58	1.22	1.2	0.02	0.03	0.59	0.54	0.05	0.05	0.08	0.11	1.56	1.56	0.06	0.16	1.2	1.2	1.44	1.51	0.45	0.44	1.38	1.37	1.65	1.66
average	1.79	1.81054	1.56607	1.43125	0.723214	0.693036	0.985179	0.996429	0.704286	0.696607	0.365357	0.390357	2.10786	2.11857	1.57768	1.58071	1.47911	1.48589	2.31589	2.33214	1.10143	1.09643	1.75732	1.75232	1.73321	1.72821
Max	2.02	2	2.14	2.1	1.75	1.82	2.19	2.07	1.45	1.45	0.83	0.8	2.74	2.74	2.17	2.18	1.8	1.8	2.79	2.8	1.9	1.88	2.72	2.72	1.77	1.78
	Morning			Night
	Min	Ave	Max	Min	Ave	Max
G1	1.5	1.79	2.02	1.58	1.81054	2
G2	1.22	1.56607	2.14	1.2	1.43125	2.1
G3	0.02	0.723214	1.75
G4
G5
G6
G7
G8
G9
G10
G11
G12
G13

## Sheet: daily ave
		G1	G2	G3	G4	G5	G6	G7	G8	G9	G10	G11	G12	G13
2013-07-25		1.95	1.95	1.85	1.85	1.85	0.25	1.38	2.29	2.8	2.57	1.27	1.49	0.31
2013-07-26		1.78	2.085	1.74	1.74	1.74	0.175	1.1	0.69	2.8	2.585	1.51	1.35	0.31
2013-07-27		1.63	2.105	1.585	1.585	1.585	0.245	0.535	0.69	2.8	2.565	1.24	1.19	0.32
2013-07-28		1.575	2.09	1.555	1.555	1.555	0.215	0.56	0.565	2.8	2.34	1.42	1.23	0.37
2013-07-29		1.72	1.26	1.505	1.505	1.505	0.335	0.725	0.835	2.8	2.46	1.26	1.2	0.35
2013-07-30		1.76	0.66	1.375	1.375	1.375	0.405	0.855	1.27	2.8	2.34	1.29	1.22	0.38
2013-07-31		1.795	1.265	1.285	1.285	1.285	0.4	0.85	1.315	2.55	2.205	1.55	0.75	0.37
2013-08-01		1.65	1.58	1.195	1.195	1.195	0.39	0.935	1.395	2.25	2.27	1.5	0.19	0.32
2013-08-02		1.5	1.52	1.2	1.2	1.2	0.41	1	1.78	2.2	2.38	1.35	1.19	0.35
2013-08-03		1.74	1.515	1.02	1.02	1.02	0.38	0.845	1.605	2.635	2.27	1.52	0.41	0.35
2013-08-04		1.755	1.35	0.965	0.965	0.965	0.275	0.81	1.735	2.565	2.345	1.57	0.27	0.33
2013-08-05		1.685	1.275	0.94	0.94	0.94	0.26	0.745	1.67	2.505	1.915	1.42	0.5	0.36
2013-08-06		1.81	1.34	0.855	0.855	0.855	0.24	0.835	1.345	2.445	1.83	1.5	0.55	0.35
2013-08-07		1.8	1.48	0.75	0.39	1.07	0.29	0.88	1.78	2.43	1.78	1.53	0.3	0.34
2013-08-08		1.74	1.175	0.825	0.35	1.04	0.33	0.61	1.555	2.315	1.495	1.54	0.2	0.36
2013-08-09		1.9	1.2	0.7	0.4	1.04	0.35	0.2	1.785	2.27	1.25	1.51	0.2	0.38
2013-08-10		1.6	1.18	0.7	0.38	0.9	0.3	0.58	2.29	2.24	1.22	1.6	0.32	0.35
2013-08-11		1.7	1.08	0.2	0.37	0.97	0.395	0.64	1.74	2.285	1.825	1.67	0.4	0.36
2013-08-12		1.78	1.085	0.79	0.36	1.07	0.37	0.395	2.23	2.295	1.35	1.42	0.46	0.32
2013-08-13		1.775	0.98	0.87	0.285	0.98	0.35	0.62	1.93	2.295	1.31	1.61	0.13	0.26
2013-08-14		1.78	0.89	1.07	0.28	0.89	0.34	0.645	2.09	2.32	1.305	1.62	0.32	0.37
2013-08-15		1.64	0.82	1.075	0.255	1.04	0.36	0.445	2.065	2.305	1.35	1.65	0.4	0.36
2013-08-16		1.78	0.9	1.1	0.26	0.98	0.43	0.69	2.05	2.37	1.36	1.46	0.39	0.35
2013-08-17		1.79	0.32	1.06	0.255	1.04	0.39	0.63	2.05	2.35	1.19	1.48	0.38	0.32
2013-08-18		1.785	0.87	1.07	0.28	1.3	0.425	0.665	2.05	2.37	1.29	1.69	0.55	0.35
2013-08-19		1.685	0.81	1.02	0.175	1.03	0.485	0.605	2.05	2.365	1.16	1.6	0.41	0.3
2013-08-20		1.81	1.31	1.05	0.23	1.045	0.38	0.64	2.05	2.435	1.285	1.88	0.46	0.33
2013-08-21		1.685	1.07	0.98	0.23	1.055	0.46	0.67	2.05	2.445	1.335	2.15	0.44	0.31
2013-08-22		1.735	0.875	0.72	0.235	1.07	0.48	0.35	2.205	2.505	1.36	2.31	0.42	0.32
2013-08-23		1.715	0.87	0.65	0.27	1.055	0.5	0.745	2.19	2.495	1.385	2.35	0.41	0.34
2013-08-24		1.77	0.905	0.69	0.29	1.01	0.505	0.71	2.115	2.49	1.39	2.35	0.39	0.34
2013-08-25		1.78	0.915	0.635	0.265	1.14	0.49	0.79	2.3	2.485	1.375	2.38	0.3	0.35
2013-08-26		1.755	0.945	0.72	0.36	1.13	0.47	0.86	2.305	2.53	1.425	2.39	0.3	0.32
2013-08-27		1.7	0.93	0.665	0.32	1.13	0.465	0.805	2.31	2.525	1.415	2.28	0.28	0.3
2013-08-28		1.83	0.945	0.65	0.315	1.175	0.49	0.7	2.34	2.53	1.42	2.46	0.25	0.36
2013-08-29		1.82	0.94	0.56	0.37	1.18	0.53	0.5	2.34	2.54	1.45	2.5	0.25	0.34
2013-08-30		1.845	0.96	0.61	0.45	1.265	0.535	0.92	2.4	2.57	1.47	2.56	0.25	0.35
2013-08-31		1.98	1.045	0.55	0.445	1.2	0.51	0.905	2.39	2.535	1.55	2.53	0.3	0.32
2013-09-01		1.98	1.07	0.55	0.455	1.235	0.55	0.94	2.4	2.565	1.54	2.5	0.28	0.34
2013-09-02		1.96	1.135	0.49	0.49	1.285	0.225	0.885	2.45	2.535	1.52	2.57	0.31	0.34
2013-09-03		1.885	1.08	0.375	0.35	1.235	0.515	0.8	2.41	2.5	1.485	2.69	0.31	0.34
2013-09-04		1.845	0.705	0.315	0.245	1.205	0.495	0.56	2.24	2.455	1.14	2.26	0.1	0.33
2013-09-05		1.815	0.245	0.195	0.25	1.25	0.515	0.62	2.265	2.435	1.51	1.89	0.01	0.35
2013-09-06		1.865	0.325	0.59	0.47	1.25	0.56	0.64	2.305	2.475	1.505	1.5	0.05	0.33
2013-09-07		1.815	0.52	0.525	0.33	1.215	0.5	0.545	2.26	2.375	1.45	1.82	0.09	0.37
2013-09-08		1.82	0.59	0.51	0.33	1.27	0.55	0.54	2.27	2.345	1.5	1.86	0.11	0.37
2013-09-09		1.86	0.9	0.7	0.32	1.4	0.55	0.7	2.32	2.4	1.4	1.73	0.12	0.34
2013-09-10		1.855	0.88	0.665	0.33	0.45	0.565	0.72	2.335	2.425	1.45	1.81	0.08	0.35
2013-09-11		1.89	0.9	0.7	0.46	0.495	0.595	0.8	2.465	2.425	1.49	2.11	0.13	0.36
2013-09-12		1.915	0.94	0.75	0.55	0.515	0.63	0.795	2.385	2.47	1.51	1.81	0.08	0.35
2013-09-13		1.935	1	0.8	0.6	0.575	0.655	0.86	2.41	2.485	1.56	2.21	0.1	0.36
2013-09-14		1.945	1.01	0.84	0.55	0.7	0.7	0.9	2.4	2.5	1.61	2.46	0.17	0.37
2013-09-15		1.94	1.03	0.84	0.8	0.75	0.6	0.91	2.405	2.535	1.625	2.38	0.17	0.34
2013-09-16		1.93	1.035	0.89	0.805	0.855	0.81	0.94	2.435	2.57	1.65	2.48	0.22	0.38
2013-09-17		1.955	1.07	1.37	0.84	1	0.855	0.97	2.505	2.605	1.675	2.45	0.35	0.36
2013-09-18		1.99	1.1	1.93	0.87	1.07	0.91	1	2.57	2.65	1.71	2.47	0.33	0.37
Ave	mean	1.79875	1.07196	0.889554	0.605982	1.10054	0.453393	0.741071	2.01205	2.48205	1.64554	1.89143	0.411786	0.343214	0.878234
min	max	1.99	2.105	1.93	1.74	1.74	0.91	1.1	2.57	2.8	2.585	2.69	1.35	0.38
max	min	1.5	0.245	0.195	0.175	0.45	0.175	0.2	0.565	2.2	1.14	1.24	0.01	0.26
		TEDAS 1	TEDAS 2	TEDAS 3	TEDAS 4	TEDAS 5	TEDAS 6	SHANKO 1	SHANKO 2	SHANKO 3	SHANKO 4	SEIFU 1	SEIFU 2	SEIFU 3
		1.745	1.175	1.0625	0.9575	1.095	0.5425	0.65	1.5675	2.5	1.8625	1.965	0.68	0.32
