# Supplementary material for: Morphological dynamics of gully systems in the sub-humid Ethiopian Highlands: The Debre Mawi watershed
Source: Copernicus journal article supplement (doi:10.5194/soil-2016-13), 2016-03-10
Supplement: Supplementary file 4 [file Gully Manuscript Data.xlsx]

## Sheet: V vs A-13 equa.developed
The gully volume-surface area relationship was developed from the detail measurements of 13 gullies										v = a(SA)b	a	b		y = 0.9167x1.184
											0.916	1.184
		Measured values						NSE				PBIAS
								a	b	c	d	e	f
	SURF.AREA		W	L	SA	V	y = 1.65x1.1	(y-x)^2	sum(y-x)^2)	(y-yave)^2	1-b/c	x-y	sum(x-y)/sumY
G1		C1	7.9	0.4	3.28	8.865	3.73844	26.2816		203338		-5.12656
		C2	8.5	1.6	16.8	47.304	25.862	459.76		170149		-21.442
		C3	12.5									0
G2		C3	3.3	2.2	9.24	17.3333	12.7424	21.0759		195773		-4.59085
		C2	5.1	1.9	11.78	21.166	16.9876	17.4592		192396		-4.17842
		C1	7.3									0
G3		C6	1.2	15	22.5	19.3125	36.5493	297.109		194025		17.2368
		C5	1.8	10	21.5	21.175	34.634	181.145		192388		13.459
		C4	2.5	1	4.8	7.36	5.86793	2.22627		204698		-1.49207
		C3	7.1	10	63	98.575	123.684	630.479		130480		25.1093
		C2	5.5	8.2	47.15	67.24	87.7602	421.08		154100		20.5202
		C1	6	0								0
G4		C4	1.5	2.6	8.19	11.999	11.0465	0.907309		200522		-0.952528
		C3	4.8	4.4	24.2	40.271	39.8412	0.184692		176001		-0.429758
		C2	6.2	1.2	7.74	14.697	10.3315	19.0573		198113		-4.36547
		C1	6.7									0
G5		C4	18.5	2.5	54.375	174.613	103.898	5000.51		81329.4		-70.7143
		C3	25	7.5	213.75	781.012	525.417	65328.9		103180		-255.595
		C2	32	5.2	162.5	548.236	379.792	28373.4		7821.7		-168.444
		C1	30.5									0
		C1	4.951	0								0
G6		C2	4.8245	13	63.5407	70.422	124.942	2972.46		151612		54.5203
		C3	5.451	26	66.7908	60.0179	132.544	5260.01		159822		72.526
		C4	7.81837	37	72.9815	62.4343	147.211	7187.05		157896		84.7765
		C5	10.1857	49	108.025	83.5829	234.2	22685.4		141536		150.617
		C6	12.07	58	100.151	74.1456	214.126	19594.6		148726		139.981
		C7	4.76	67	75.735	50.976	153.809	10574.7		167133		102.833
		C8	13	80	115.44	217.414	253.353	1291.58		58748.8		35.9385
		C9	17.304	92	181.824	426.236	433.833	57.7103		1126.23		7.59673
		C10	14.618	101	143.649	408.581	328.202	6460.8		2622.89		-80.3791
		C11	19.6486	111	171.333	534.961	404.355	17057.9		5649.79		-130.606
		C12	37.53	122	314.482	932.841	829.944	10587.6		223772		-102.896
		C13	36.7	136	519.61	1653.82	1504.03	22434.8		1.42569e+06		-149.782
		C14	38.8	150	528.5	1658.31	1534.55	15315.6		1.43642e+06		-123.756
		C15	40.5	163	515.45	1757.31	1489.79	71570.8		1.68356e+06		-267.527
		C16	38	172	353.25	1332.21	952.412	144244		761102		-379.795
		C17	33.05	183	390.775	1385.79	1073.34	97628		857472		-312.455
		C18	32.966	193	330.08	1128.09	878.902	62094.7		446618		-249.188
		C19	35.5165	205	410.895	1414.52	1139.08	75871.3		911506		-275.447
		C20	38	216	404.341	1328.06	1117.6	44295		753881		-210.464
		C21	30.6255	232	549.004	1934.18	1605.29	108173		2.17382e+06		-328.896
		C22	32.976	245	413.41	1426.75	1147.33	78073.2		935003		-279.416
		C23	30.247	261	505.784	1543.35	1456.77	7497.03		1.1741e+06		-86.5854
		C24	31.3035	272	338.528	1059.65	905.597	23732.7		359827		-154.054
		C25	42.16	283	404.049	1177.36	1116.64	3686.82		514899		-60.7192
		C26	45.0015	292	392.227	1103.05	1078.06	624.29		413773		-24.9858
		C27	36.843	301	368.3	1060.74	1000.64	3612.1		361137		-60.1008
		C28	14.5745	310	231.379	695.006	577.105	13900.8		55323.9		-117.901
		C29	9.006	320	117.903	340.548	259.764	6526.08		14220		-80.7842
		C30	17.402	332	158.448	389.439	368.605	434.04		4950.08		-20.8336
		C31	17.998	344	212.4	552.564	521.491	965.532		8605.89		-31.073
			22.892	354	204.45	496.776	498.46	2.83557		1367.58		1.68392
			10.696	365	184.734	421.162	442.066	436.958		1492.53		20.9035
			10.372	377	126.408	294.506	282.096	154.015		27320.7		-12.4103
			11.2	389	129.432	237.757	290.103	2740.15		49301.2		52.3465
G7		C3	1.6	0.2	0.66	0.81	0.560061	0.0624694		210668		-0.249939
		C2	5	1.6	9.84	13.82	13.7278	0.0084966		198894		-0.092177
		C1	7.3	0								0
G8		C1	11.5	0								0
		C2	11.6	2.4	27.72	93.756	46.791	2205.71		133985		-46.965
		C3	9	2.5	25.75	94.0062	42.8801	2613.88		133802		-51.1262
		C4	12	2.5	26.25	81.775	43.8677	1436.97		142900		-37.9073
		C5	12	8	96	263.38	203.659	3566.54		38579.1		-59.7205
		C6	5.7	5.4	47.79	100.818	89.1724	135.62		128865		-11.6456
		C7	3.2	10	44.5	59.2	81.9509	517.603		160477		22.7509
		C8	3	6	18.6	26.025	29.1742	9.91739		188157		3.14919
		C9	1.4	3	6.6	9.36	8.5553	0.647534		202892		-0.804695
G9		C3	2.6	3.8	16.91	48.9345	26.0626	523.124		168807		-22.8719
		C2	6.3	2.4	14.88	44.688	22.4005	496.734		172314		-22.2875
		C1	6.1									0
G10		C3	3	0.7	2.66	5.9955	2.91713	9.47638		205935		-3.07837
		C2	4.6	3	16.5	37.425	25.3161	146.626		178397		-12.1089
		C1	6.4									0
G11		C1	17.1	0								0
		C2	18.85	5.4	97.065	667.097	206.337	212300		42973.9		-460.76
		C3	11.1	3.4	50.915	358.577	96.1171	68885		10245.3		-262.46
		C4	5.9	2.8	23.8	149.478	39.0627	12191.5		96297		-110.415
G12		C2	2.4	2	5	9.28	6.15851	9.74367		202964		-3.12149
		C1	2.6
G13		C2	2.5	1.5	8.1	9.94875	10.9029	0.910388		202362		0.954143
		C1	8.3
			SUM			31266.1	26910	1.29357e+06		2.08139e+07	0.93785	-4356.1	-0.139323
			AVE			459.796

## Sheet: Totalvolume-Table 1
	Predicted volume from the relation developed					V = 0.9167A1.184	0.9167	1.184
	2005			2013
	shape length (m)	area (m2)	V (m3)	shape length (m)	area (m2)	V (m3)
	481.681	3720.42	15481.3	50.1231	119.533	264.223
	170.355	297.779	778.605	61.928	79.9082	164.019
	1737.25	7349.13	34661.8	44.6637	74.5144	150.994
	130.872	267.406	685.484	123.744	110.136	239.812
	1117.11	4253.9	18143.1	78.6295	380.743	1041.59
	158.734	507.335	1463.17	152.237	252.328	639.962
	420.944	967.29	3141.42	103.328	163.569	383.045
	196.43	390.304	1072.63	41.7457	151.049	348.579
	76.1458	152.357	352.156	59.1773	115.891	254.719
	95.87	226.828	564.121	42.8396	462.873	1312.61
	81.78	93.7321	198.127	172.132	52.6923	100.179
	323.77	616.644	1843.44	68.3288	61.5939	120.515
	371.574	641.998	1933.51	40.2287	73.7336	149.123
	394.106	418.568	1165.2	85.2623	78.6842	161.049
	242.078	643.154	1937.63	61.8099	194.684	470.755
	92.6344	2.84011	3.15484	511.468	132.627	298.83
	929.295	2425.59	9329.32	367.404	131.9	296.892
	730.387	1355.81	4685.44	147	49.9377	94.0084
	486.764	454.441	1284.34	74.6467	826.917	2609.17
	133.886	188.964	454.424	449.423	784.575	2451.74
	236.406	597.368	1775.41	151.699	335.694	897.314
	538.487	1284.19	4393.85	629.758	21.9901	35.5979
	200.305	297.301	777.127	94.3684	27.7307	46.8481
	470.256	1057.12	3489.72	516.483	129.747	291.163
	436.354	858.018	2725.75	29.2314	1052.72	3472.54
	553.712	486.041	1390.75	219.746	1118.83	3732.18
	843.706	746.862	2312.83	71.2581	825.453	2603.7
	65.2554	148.054	340.413	541.377	391.379	1076.12
	53.4786	54.041	103.222	237.634	383.893	1051.8
	170.179	496.436	1426.03	157.658	1154.11	3871.91
	1008.62	4795.68	20910	128.247	893.673	2860.37
	168.626	531.594	1546.37	49.0043	316.38	836.516
	300.763	421.909	1176.21	259.386	204.341	498.527
	691.473	937.008	3025.32	130.21	274.007	705.564
	780.498	1668.52	5990.55	199.641	84.216	174.54
	877.122	1961.38	7254.71	80.9304	112.818	246.743
	188.329	228.049	567.717	557.375	1069.11	3536.64
	132.551	181.481	433.196	75.3715	641.561	1931.95
	72.5257	72.4442	146.04	321.921	1090.47	3620.44
	100.15	130.078	292.042	301.014	769.157	2394.8
	326.348	204.815	499.897	508.485	103.084	221.74
	829.163	2883.4	11448.7	1088.01	331.156	882.971
	70.8771	83.1934	172.033	372.738	156.909	364.648
Total	17486.9	45099.5	171376	232.156	1367.03	4731.38
Length	8743.43			460.446	62.6171	122.889
ton			207365	626.415	93.2271	196.864
				571.051	33.0626	57.693
				198.106	120.17	265.892
				180.273	123.482	274.592
				141.699	177.486	421.928
				95.3442	530.922	1544.06
				139.085	286.922	745.109
				144.46	6050.95	27536.4
				16.1973	507.966	1465.33
				101.295	601.901	1791.37
				253.147	464.878	1319.34
				180.516	222.638	551.805
				302.684	38.0561	68.1474
				324.163	1320.88	4542.87
				225.927	119.46	264.034
				70.6494	180.291	429.833
				97.4414	616.999	1844.69
				133.705	162.073	378.901
				107.658	475.886	1356.41
				238.189	233.219	582.987
				193.282	244.679	617.057
				40.0283	324.033	860.528
				397.202	142.029	324.072
				214.828	355.774	961.207
				319.597	1705.66	6148.77
				111.804	1207.53	4085.03
				194.143	401.66	1109.67
				436.681	202.456	493.086
				225.013	86.8822	181.101
				410.907	33.8989	59.4247
				165.57	39.6068	71.4474
				314.903	96.5214	205.126
				1011.43	110.36	240.39
				1395.57	348.108	936.734
				734.185	150.205	346.276
				79.2057	457.491	1294.55
				64.6943	143.789	328.832
				131.456	91.4894	192.526
				71.2921	27.1982	45.785
				441.729	34.1157	59.875
				122.851	4359.53	18677.7
				978.344	676.842	2058.37
				270.365	550.435	1611.47
				165.815	123.164	273.754
				97.4352	625.465	1874.7
				301.157	162.349	379.664
				230.604	475.39	1354.74
				57.2263	101.903	218.736
				912.11	61.001	119.142
				345.961	131.031	294.576
				917.319	57.2172	110.443
				635.635	114.465	251.012
				626.175	186.238	446.67
				744.44	250.761	635.259
				757.609	314.184	829.646
				501.273	297.082	776.45
				614.342	887.648	2837.56
				161.806	260.381	664.214
				84.1173	73.2343	147.928
				96.8163	1102.9	3669.37
				533.508	135.293	305.954
				129.702	299.445	783.765
				63.1215	83.6144	173.065
				108.216	483.109	1380.82
				125.693	159.416	371.558
				36.7894	338.108	904.96
				22.9218	219.538	542.717
				78.6002	2255.56	8560.15
				478.649	199.923	485.791
				320.041	150.762	347.797
				229.943	138.053	313.359
				126.579	170.418	402.107
				315.403	250.002	632.983
				352.063	147.344	338.479
				129.451	331.965	885.524
				144.485	89.2174	186.879
				231.454	745.998	2309.66
				85.7985	351.6	947.87
				86.4474	78.3121	160.148
				186.744	812.429	2555.13
				43.0866	723.271	2226.59
				134.919	51.2787	97.0047
				63.595	95.9353	203.653
				27.0927	236.247	591.96
				79.997	824.525	2600.23
				133.882	127.441	285.045
				175.867	57.0626	110.09
				90.4199	776.924	2423.46
				204.513	175.026	415.013
				115.784	150.95	348.309
				74.6428	269.956	693.231
				49.9228	388.468	1066.65
				114.979	304.157	798.39
				90.7291	640.86	1929.45
				33.7917	845.526	2678.83
				40.2153	163.835	383.781
				63.0479	62.317	122.192
				193.621	352.413	950.466
				112.879	605.709	1804.79
				240.46	982.028	3198.17
				77.3577	19.4663	30.8134
				633.7	2521.82	9769.13
				67.2412	79.3647	162.699
				151.581	851.736	2702.14
				61.1489	2582.89	10049.9
				84.9617	2458.45	9479.18
				485.354	235.052	588.418
				288.547	1682.14	6048.5
				105.623	1214.99	4114.91
				93.0428	384.99	1055.36
				87.1309	269.008	690.348
				66.6607	507.869	1465
				238.129	40.628	73.6336
				150.805	70.0766	140.406
				120.25	128.097	286.783
				53.3552	38.8747	69.8864
				76.6558	142.187	324.498
				89.1783	73.1044	147.617
				136.753	132.307	297.977
				149.545	3254.73	13214.3
				180.057	183.452	438.77
				196.809	70.437	141.261
				986.3	144.244	330.064
				87.0498	412.209	1144.26
				42.6592	775.555	2418.4
				48.0233	67.9562	135.39
				32.4179	3273.37	13304
				56.2062	127.458	285.091
				44.9222	126.922	283.671
				68.8504	52.3317	99.3676
				118.612	580.464	1716.08
				218.496	852.017	2703.2
				367.691	12577.3	65484.7
				449.013	551.204	1614.14
				102.608	782.844	2445.34
				329.731	604.339	1799.96
				104.945	6386.39	29352.8
				57.7965	584.036	1728.59
				45.7601	564.379	1659.92
				44.0468	440.501	1237.83
				79.1713	7371.51	34786.8
				53.8004	4416.42	18966.6
				61.1859	378.811	1035.33
				75.8034	2292.95	8728.4
				159.852	1252.48	4265.66
				44.5111	308.462	811.786
				99.3784	48.2558	90.2713
				156.602	84.0824	174.212
				260.016	51.8727	98.3366
				49.4327	221.386	548.133
				83.7184	52.4134	99.5514
				48.4802	1687.53	6071.47
				28.0199	1061.97	3508.69
				28.16	1615.08	5764.08
				85.8151	13370.8	70404
				285.345	329.48	877.681
				70.1168	5891.35	26678.5
				79.9464	6172.09	28190.3
				70.9874	1124.29	3753.75
				180.195	859.332	2730.7
				150.105	2817.85	11141.2
				70.6649	734.167	2266.36
				237.781	3942	16578.9
				63.4393	268.189	687.862
				37.1961	2264.16	8598.77
				245.46	1842.56	6737.32
				226.642	531.056	1544.52
				29.3727	713.551	2191.2
				42.5962	3656.28	15165.8
				70.7156	220.936	546.814
				76.0053	2875.59	11411.9
				146.141	11.5941	16.6834
				49.5868	75.2384	152.732
				894.16	110.527	240.82
				196.465	695.172	2124.54
				95.8223	410.098	1137.33
				110.093	156.854	364.496
				192.906	28.5042	48.3993
				68.7745	151.983	351.133
				44.8192	117.63	259.251
				171.238	352.25	949.947
				377.591	192.197	463.641
				226.001	880.493	2810.49
				47.2193	242.772	611.369
				57.5911	159.263	371.133
				46.2905	5692.65	25616.5
				94.9103	1033.34	3396.96
				43.2924	5089.1	22433.1
				358.813	2638.92	10308.5
				363.013	433.176	1213.49
				141.207	1427.13	4978.64
				584.722	620.468	1856.98
				481.743	91.3571	192.197
				173.869	79.8153	163.794
				98.1062	226.507	563.176
				600.838	5767.7	26016.8
				118.666	70.6754	141.828
				95.3057	170.489	402.306
				177.861	556.458	1632.37
				148.159	548.763	1605.68
			Total	51997	204198	792621	m3
			Length (m)	25998.5
					20.4198	959072	tons
						0.751707	Million tons
						154.545

## Sheet: Table2
											y = 0.9167x1.184
	Gully name	Gully surface area (m2)						Change (m2)	Bulk density
		From aerial image				Manual measurement			(g cm-3)	V(m3) 2005	V(m3) 2014
		2005-03-06	2011-05-04	2012-04-03	2013-03-23	2013-09-18	2014-10-18			2005-03-06	2014-10-18	Change V	Soil loss (t)	soil loss 2013-2014 (t)	change in A(2013-2014)	DA	t/ha/yr
	G1	140	265	390	420	440	440	300	1.26	318.598	1236.16	917.564	1156.13	83.4703	20	12.8	9.03227
	G2	785	2700	3330	3560	3573	3575	2790	1.19	2453.31	14767.5	12314.2	14653.8	87.2674	15	13	112.722
	G3	210	530	600	1430	1460	1460	1250	1.14	514.914	5114.71	4599.8	5243.77	141.586	30	41.6	12.6052
	G4	230	400	450	750	780	785	555	1.17	573.473	2453.31	1879.84	2199.41	150.897	35	1.7	129.377
	G5	2820	10700	11500	13700	13960	14050	11230	1.16	11151.2	74657.9	63506.7	73667.8	2548.44	350	68	108.335
	G6	1720	6770	8100	9110	9580	9960	8240	1.22	6210.02	49678.2	43468.2	53031.2	6074.79	850	13.3	398.731
	G7	110	365	365	385	390	390	280	1.15	239.462	1071.64	832.175	957.002	18.6848	5	0.7	136.715
	G8	365	2140	2860	3740	3850	3890	3525	1.19	990.791	16320.3	15329.5	18242.1	883.503	150	17.4	104.84
	G9	40	730	1050	1120	1150	1180	1140	1.19	72.288	3974.99	3902.7	4644.21	283.425	60	6.8	68.2972
	G10	50	190	400	455	460	460	410	1.25	94.1473	1302.96	1208.82	1511.02	20.9397	5	6.5	23.2465
	G11	152	600	750	890	1020	1070	918	1.23	351.18	3540.12	3188.94	3922.39	853.199	180	9.2	42.6347
	G12	50	170	240	255	255	260	210	1.22	94.1473	663.064	568.917	694.079	18.3861	5	4.1	16.9288
	G13	199	240	345	365	370	370	171	1.14	483.136	1006.88	523.745	597.069	18.3426	5	4.8	12.4389
	Total	6871	25800	30380	36180	37288	37890	31019		23546.7	175788	152241	180520	11182.9	1710	199.9	90.3052
													min	18.3426		min	9.03227
													max	6074.79		max	398.731
													avee	860.225		avee	90.4541

## Sheet: Fig.2
	2013-06-28			2013-07-23			2013-08-05			2013-08-09			2013-08-31			2013-09-18
	W	H	L	W	H	L	W	H	L	W	H	L	W	H	L	W	H	L
	-4.3	0		-5	0		-5	0		-7.2	0		-7.3	0	4.3	-7.7	0	4.3
	-1.3	-2.1		-1.8	-2.2		-1.8	-2		-3.2	-2		-4.3	-1.5		-5.4	-1.3
	-0.5	-5		-0.8	-4.8		-0.8	-5.1		-1	-5.8		-1	-5.7		-1	-5.8
	0.5	-5		0.7	-4.8		0.7	-5.1		1	-5.8		1	-5.7		1	-5.8
	1.3	-3.2		2.4	-3		2.4	-3		2.5	-3.2		3.7	-2.7		5.1	-1.8
	3.8	0		4.95	0		5	0		7.29	0		7.05	0		8.9	0

## Sheet: Fig.4
		Fig.4 (a)						Fig.4(b) only by headcut retreat
		Commulative head cut retreat					Total measured	2013		2014
	2013-06-28	2013-07-23	2013-08-05	2013-08-13	2013-08-30		GULLY NAME	Increased area (2013)	Increased volumee (2013)	Increased area (2014)	Increased volume (2014)
	0	0	0	0	0.4		G5	233.75	955.625	42.9	131.22				2011	936	4580.45
				1	1.2		G6	111.42	412.922	0	0				2012	890	5799.63
	0	10	11	21	36		G3	109.5	146.423	0	0				2013	917	1108.09
	0	0	0	4.4	7		G8	84.98	194.818	27	41.56				2014	1107	598.007
	0	0	0	7.5	10		G11	54.26	319.055	11.06	36.547
	0	0	5.9	9.3	11.9		G4	25.02	40.271	16.5	20.825
	0	0	0	0	0.2		G9	9.88	48.9345	7.095	24.4489
	0	5.4	15.4	21.4	24.4		G2	7.26	30.5663	0.8	1.81313
	0	0	0	0	3.8		G1	3.16	8.865	0	0
	0	0	0	0	0.7		G10	2.1	5.9955	0	0
	0	0	0	3.4	6.2		G7	0.32	0.81	0	0
	0	0	0	0	0.07		G12	0	0	0	0
	0	0	0	0	0.04		G13	0	0	1.52	2.464
								641.65	2164.29	106.875	258.878	2883.56
		Gully characterstis in the total gully length of 13 gullies
						CHANGE IN AREA		VOLUME			CHANGE IN V		soil loss
	2013-03-23	2013-09-18	2014-10-18					2013-03-23	2013-09-18	2014-10-18	2013	2014	2013	2014	Total
G1	420	440	440		1.26	20	0	1169.92	1236.16	1236.16	66.2462	0	83.4703	0	83.4703
G2	3560	3573	3575		1.19	13	2	14694.1	14757.7	14767.5	63.5528	9.78114	75.6279	11.6396	87.2674
G3	1430	1460	1460		1.14	30	0	4990.51	5114.71	5114.71	124.198	0	141.586	0	141.586
G4	750	780	785		1.17	30	5	2324.34	2434.82	2453.31	110.482	18.4906	129.263	21.6339	150.897
G5	13700	13960	14050		1.16	260	90	72461	74092	74657.9	1631.03	565.897	1892	656.441	2548.44
G6	9110	9580	9960		1.22	470	380	44698.9	47442.1	49678.2	2743.19	2236.14	3346.7	2728.09	6074.79
G7	385	390	390		1.15	5	0	1055.39	1071.64	1071.64	16.2476	0	18.6848	0	18.6848
G8	3740	3850	3890		1.19	110	40	15577.8	16121.8	16320.3	543.932	198.508	647.279	236.224	883.503
G9	1120	1150	1180		1.19	30	30	3736.81	3855.61	3974.99	118.8	119.372	141.372	142.053	283.425
G10	455	460	460		1.25	5	0	1286.21	1302.96	1302.96	16.7518	0	20.9397	0	20.9397
G11	890	1020	1070		1.23	130	50	2846.46	3345.11	3540.12	498.646	195.011	613.335	239.864	853.199
G12	255	255	260		1.22	0	5	647.994	647.994	663.064	0	15.0706	0	18.3861	18.3861
G13	365	370	370		1.14	5	0	990.791	1006.88	1006.88	16.09	0	18.3426	0	18.3426
	36180	37288	37890			1108	602	166480	172429	175788	5949.17	3358.27	7128.59	4054.33	11182.9

## Sheet: Fig.5
Gully name	Min. water table depth (m)	ave headcut depth (m)
G1	1.5	3.92333
G2	1.22	2.23333
G3	0.02	1.38333
G4	0.59	2.025
G5	0.05	4.745
G6	0.075	4.56667
G7	1.36	1.43333
G8	0.065	3.28889
G9	1.2	3.4
G10	1.44	2.53333
G11	0.45	4.225
G12	1.38	1.9
G13	1.25	1.3
